# Supplementary material for: A transcriptomic study of probenecid on injured spinal cords in mice
Source: PeerJ. 2020 Jan 3;8:e8367. doi: 10.7717/peerj.8367 (PMC6944129; doi:10.7717/peerj.8367)
Supplement: Supplemental Information 3 [file peerj-08-8367-s003.xlsx]

## Sheet: SCIvssham_down_GOEnrichment
GO_accession	Description	Term_type	Over_represented_pValue	Corrected_pValue	DEG_item	DEG_list	Bg_item	Bg_list	Gene_names
GO:0005515	protein binding	molecular_function	3.3973e-08	9.9228e-05	459	1274	7713	29496	ENSMUSG00000024325,ENSMUSG00000030093,ENSMUSG00000025407,ENSMUSG00000022822,ENSMUSG00000044072,ENSMUSG00000035901,ENSMUSG00000028949,ENSMUSG00000047787,ENSMUSG00000022099,ENSMUSG00000059857,ENSMUSG00000022272,ENSMUSG00000076435,ENSMUSG00000024381,ENSMUSG00000020101,ENSMUSG00000086189,ENSMUSG00000030731,ENSMUSG00000002109,ENSMUSG00000028229,ENSMUSG00000035235,ENSMUSG00000068923,ENSMUSG00000024176,…
GO:0005488	binding	molecular_function	4.1199e-08	9.9228e-05	833	1274	15897	29496	ENSMUSG00000034574,ENSMUSG00000031256,ENSMUSG00000019990,ENSMUSG00000050199,ENSMUSG00000024070,ENSMUSG00000035649,ENSMUSG00000075289,ENSMUSG00000030727,ENSMUSG00000026443,ENSMUSG00000038352,ENSMUSG00000033970,ENSMUSG00000014786,ENSMUSG00000037370,ENSMUSG00000041377,ENSMUSG00000059146,ENSMUSG00000021506,ENSMUSG00000044768,ENSMUSG00000045039,ENSMUSG00000052369,ENSMUSG00000021685,ENSMUSG00000044447,…
GO:0005234	extracellular-glutamate-gated ion channel activity	molecular_function	4.1413e-06	0.0066496	9	1274	21	29496	ENSMUSG00000035745,ENSMUSG00000022935,ENSMUSG00000026959,ENSMUSG00000056073,ENSMUSG00000085830,ENSMUSG00000032017,ENSMUSG00000025892,ENSMUSG00000039579,ENSMUSG00000002771
GO:0003993	acid phosphatase activity	molecular_function	7.2635e-06	0.008747	23	1274	132	29496	ENSMUSG00000060534,ENSMUSG00000037139,ENSMUSG00000032537,ENSMUSG00000029869,ENSMUSG00000040648,ENSMUSG00000015829,ENSMUSG00000034648,ENSMUSG00000033526,ENSMUSG00000053024,ENSMUSG00000064293,ENSMUSG00000026235,ENSMUSG00000028399,ENSMUSG00000032816,ENSMUSG00000038119,ENSMUSG00000028876,ENSMUSG00000039488,ENSMUSG00000022883,ENSMUSG00000028093,ENSMUSG00000055022,ENSMUSG00000028661,ENSMUSG00000030092,…
GO:0005215	transporter activity	molecular_function	3.1982e-05	0.030811	165	1274	2347	29496	ENSMUSG00000037490,ENSMUSG00000051166,ENSMUSG00000022822,ENSMUSG00000026510,ENSMUSG00000044122,ENSMUSG00000043670,ENSMUSG00000110027,ENSMUSG00000024593,ENSMUSG00000020544,ENSMUSG00000023017,ENSMUSG00000037578,ENSMUSG00000048163,ENSMUSG00000002771,ENSMUSG00000030307,ENSMUSG00000034614,ENSMUSG00000035235,ENSMUSG00000062296,ENSMUSG00000038963,ENSMUSG00000032017,ENSMUSG00000022843,ENSMUSG00000038836,…
GO:0006013	mannose metabolic process	biological_process	4.8645e-05	0.039054	4	1274	5	29496	ENSMUSG00000005142,ENSMUSG00000038886,ENSMUSG00000029119,ENSMUSG00000032295
GO:0005231	excitatory extracellular ligand-gated ion channel activity	molecular_function	6.0097e-05	0.041355	9	1274	30	29496	ENSMUSG00000025892,ENSMUSG00000085830,ENSMUSG00000032017,ENSMUSG00000039579,ENSMUSG00000002771,ENSMUSG00000035745,ENSMUSG00000022935,ENSMUSG00000056073,ENSMUSG00000026959
GO:0022857	transmembrane transporter activity	molecular_function	7.7298e-05	0.046543	145	1274	2035	29496	Novel00515,ENSMUSG00000021268,Novel00060,ENSMUSG00000085830,ENSMUSG00000051910,ENSMUSG00000026932,ENSMUSG00000028962,ENSMUSG00000068323,ENSMUSG00000042834,ENSMUSG00000055421,ENSMUSG00000024869,ENSMUSG00000047875,ENSMUSG00000013495,ENSMUSG00000029151,ENSMUSG00000090256,ENSMUSG00000032796,ENSMUSG00000048022,ENSMUSG00000035745,ENSMUSG00000026904,Novel00159,ENSMUSG00000022756,ENSMUSG00000045404,ENSMU…
GO:0008509	anion transmembrane transporter activity	molecular_function	8.7951e-05	0.047073	20	1274	142	29496	ENSMUSG00000028962,ENSMUSG00000006469,ENSMUSG00000024485,ENSMUSG00000029862,ENSMUSG00000022843,ENSMUSG00000064202,ENSMUSG00000022265,ENSMUSG00000024597,ENSMUSG00000022756,ENSMUSG00000006576,ENSMUSG00000020651,ENSMUSG00000026904,ENSMUSG00000001225,ENSMUSG00000064293,ENSMUSG00000060961,ENSMUSG00000032064,ENSMUSG00000020723,ENSMUSG00000068323,ENSMUSG00000030495,ENSMUSG00000042268

## Sheet: UP
GO_accession	Description	Term_type	Over_represented_pValue	Corrected_pValue	DEG_item	DEG_list	Bg_item	Bg_list	Gene_names

## Sheet: DOWN
GO_accession	Description	Term_type	Over_represented_pValue	Corrected_pValue	DEG_item	DEG_list	Bg_item	Bg_list	Gene_names
GO:0005515	protein binding	molecular_function	9.4461e-11	4.5502e-07	139	301	7713	29496	ENSMUSG00000027276,ENSMUSG00000020154,ENSMUSG00000029622,ENSMUSG00000030237,ENSMUSG00000035451,ENSMUSG00000027907,ENSMUSG00000029561,ENSMUSG00000032194,ENSMUSG00000021388,ENSMUSG00000032596,ENSMUSG00000057836,ENSMUSG00000001930,ENSMUSG00000030737,ENSMUSG00000037095,ENSMUSG00000041445,ENSMUSG00000032440,ENSMUSG00000000317,ENSMUSG00000020325,ENSMUSG00000053198,ENSMUSG00000071713,ENSMUSG00000062960,…
GO:0005488	binding	molecular_function	1.1046e-06	0.0026603	213	301	15897	29496	ENSMUSG00000034911,ENSMUSG00000024913,ENSMUSG00000039167,ENSMUSG00000000359,ENSMUSG00000021922,ENSMUSG00000016087,ENSMUSG00000074899,ENSMUSG00000079293,ENSMUSG00000001029,ENSMUSG00000047592,ENSMUSG00000039062,ENSMUSG00000040732,ENSMUSG00000074364,ENSMUSG00000002108,ENSMUSG00000031207,ENSMUSG00000039005,ENSMUSG00000022584,ENSMUSG00000030536,ENSMUSG00000051124,ENSMUSG00000002900,ENSMUSG00000026193,…
GO:0043565	sequence-specific DNA binding	molecular_function	2.0591e-05	0.033062	22	301	680	29496	ENSMUSG00000040451,ENSMUSG00000026365,ENSMUSG00000050295,ENSMUSG00000051490,ENSMUSG00000031465,ENSMUSG00000000223,ENSMUSG00000035451,ENSMUSG00000038415,ENSMUSG00000015053,ENSMUSG00000025504,ENSMUSG00000032035,ENSMUSG00000030536,ENSMUSG00000058794,ENSMUSG00000038402,ENSMUSG00000050397,ENSMUSG00000002108,ENSMUSG00000025610,ENSMUSG00000008398,ENSMUSG00000040732,ENSMUSG00000020484,ENSMUSG00000016087,…
