# Supplementary material for: A transcriptomic study of probenecid on injured spinal cords in mice
Source: PeerJ. 2020 Jan 3;8:e8367. doi: 10.7717/peerj.8367 (PMC6944129; doi:10.7717/peerj.8367)
Supplement: Supplemental Information 4 [file peerj-08-8367-s004.xlsx]

## Sheet: up
##Databases: KEGG PATHWAY
##Statistical test method: hypergeometric test / Fisher's exact test
##FDR correction method: Benjamini and Hochberg
#Term	Database	ID	Input number	Background number	P-Value	Corrected P-Value	Input	KEGG_ID/KO	Entrez_ID	Hyperlink
Malaria	KEGG PATHWAY	mmu05144	33	48	2.80443e-07	7.48784e-05	ENSMUSG00000038067|ENSMUSG00000009376|ENSMUSG00000020717|ENSMUSG00000039239|ENSMUSG00000017652|ENSMUSG00000037405|ENSMUSG00000032508|ENSMUSG00000052305|ENSMUSG00000028864|ENSMUSG00000035352|ENSMUSG00000024401|ENSMUSG00000090081|ENSMUSG00000020592|ENSMUSG00000039005|ENSMUSG00000073940|ENSMUSG00000069917|ENSMUSG00000069919|ENSMUSG00000021253|ENSMUSG00000021702|ENSMUSG00000051839|ENSMUSG00000026582|…	mmu:12985|mmu:17295|mmu:18613|mmu:21808|mmu:21939|mmu:15894|mmu:17874|mmu:100503605|mmu:15234|mmu:20293|mmu:21926|mmu:20344|mmu:20969|mmu:21898|mmu:100503605|mmu:15122|mmu:15122|mmu:21809|mmu:21828|mmu:14934|mmu:20339|mmu:20344|mmu:21826|mmu:71683|mmu:12491|mmu:16176|mmu:16408|mmu:21825|mmu:16414|mmu:20296|mmu:24088|mmu:16193|mmu:13349|	12985|17295|18613|21808|21939|15894|17874|100503605|15234|20293|21926|20344|20969|21898|100503605|15122|15122|21809|21828|14934|20339|20344|21826|71683|12491|16176|16408|21825|16414|20296|24088|16193|13349|	http://www.genome.jp/kegg-bin/show_pathway?mmu05144/mmu:12491%09red/mmu:16408%09red/mmu:100503605%09red/mmu:14934%09red/mmu:21809%09red/mmu:21808%09red/mmu:21828%09red/mmu:21826%09red/mmu:21825%09red/mmu:21926%09red/mmu:16193%09red/mmu:20339%09red/mmu:71683%09red/mmu:17874%09red/mmu:15234%09red/mmu:12985%09red/mmu:16414%09red/mmu:20296%09red/mmu:21898%09red/mmu:20293%09red/mmu:13349%09red/mmu:209…
Osteoclast differentiation	KEGG PATHWAY	mmu04380	58	126	6.25188e-07	8.34626e-05	ENSMUSG00000021457|ENSMUSG00000020009|ENSMUSG00000059498|ENSMUSG00000040033|ENSMUSG00000031264|ENSMUSG00000002111|ENSMUSG00000026656|ENSMUSG00000095788|ENSMUSG00000078783|ENSMUSG00000027398|ENSMUSG00000002699|ENSMUSG00000003545|ENSMUSG00000024912|ENSMUSG00000033016|ENSMUSG00000006519|ENSMUSG00000024927|ENSMUSG00000052837|ENSMUSG00000032440|ENSMUSG00000031834|ENSMUSG00000004056|ENSMUSG00000022015|…	mmu:20963|mmu:15979|mmu:14131|mmu:20847|mmu:12229|mmu:20375|mmu:14130|mmu:320832|mmu:751864|mmu:16176|mmu:16822|mmu:14282|mmu:14283|mmu:18018|mmu:13057|mmu:19697|mmu:16477|mmu:21813|mmu:18709|mmu:11652|mmu:21943|mmu:14129|mmu:18034|mmu:19698|mmu:246256|mmu:18035|mmu:21926|mmu:16476|mmu:17972|mmu:18733|mmu:668101|mmu:17970|mmu:18383|mmu:14281|mmu:20846|mmu:21808|mmu:12702|mmu:21937|mmu:22177|mmu:1…	20963|15979|14131|20847|12229|20375|14130|320832|751864|16176|16822|14282|14283|18018|13057|19697|16477|21813|18709|11652|21943|14129|18034|19698|246256|18035|21926|16476|17972|18733|668101|17970|18383|14281|20846|21808|12702|21937|22177|16175|21682|13058|19057|18726|26400|320207|12977|14284|18033|15975|16391|12703|53859|26416|17969|234779|16177|11433|	http://www.genome.jp/kegg-bin/show_pathway?mmu04380/mmu:18033%09red/mmu:14131%09red/mmu:14130%09red/mmu:16391%09red/mmu:11433%09red/mmu:19057%09red/mmu:320832%09red/mmu:21943%09red/mmu:21808%09red/mmu:18726%09red/mmu:15975%09red/mmu:19697%09red/mmu:18709%09red/mmu:19698%09red/mmu:21926%09red/mmu:26416%09red/mmu:15979%09red/mmu:20375%09red/mmu:22177%09red/mmu:320207%09red/mmu:18034%09red/mmu:18035…
TNF signaling pathway	KEGG PATHWAY	mmu04668	52	109	1.0216e-06	9.09223e-05	ENSMUSG00000031834|ENSMUSG00000103439|ENSMUSG00000032487|ENSMUSG00000029380|ENSMUSG00000012519|ENSMUSG00000021367|ENSMUSG00000056501|ENSMUSG00000002948|ENSMUSG00000052684|ENSMUSG00000024927|ENSMUSG00000037405|ENSMUSG00000022221|ENSMUSG00000026029|ENSMUSG00000052837|ENSMUSG00000043613|ENSMUSG00000055994|ENSMUSG00000004056|ENSMUSG00000024235|ENSMUSG00000038648|ENSMUSG00000035385|ENSMUSG00000035352|…	mmu:18709|mmu:11796|mmu:19225|mmu:14825|mmu:74568|mmu:13614|mmu:12608|mmu:26400|mmu:16476|mmu:19697|mmu:15894|mmu:56532|mmu:12370|mmu:16477|mmu:17392|mmu:257632|mmu:11652|mmu:26410|mmu:208647|mmu:20296|mmu:20293|mmu:21926|mmu:16878|mmu:14281|mmu:19766|mmu:20339|mmu:20310|mmu:21937|mmu:18035|mmu:330122|mmu:15945|mmu:16176|mmu:12702|mmu:20304|mmu:11911|mmu:21938|mmu:320207|mmu:12977|mmu:12051|mmu:1…	18709|11796|19225|14825|74568|13614|12608|26400|16476|19697|15894|56532|12370|16477|17392|257632|11652|26410|208647|20296|20293|21926|16878|14281|19766|20339|20310|21937|18035|330122|15945|16176|12702|20304|11911|21938|320207|12977|12051|18033|11797|12633|11796|53859|26416|16193|12981|26397|21929|26427|14102|16182|	http://www.genome.jp/kegg-bin/show_pathway?mmu04668/mmu:18033%09red/mmu:12370%09red/mmu:21929%09red/mmu:19697%09red/mmu:18709%09red/mmu:16193%09red/mmu:21926%09red/mmu:26416%09red/mmu:26400%09red/mmu:20339%09red/mmu:12633%09red/mmu:26410%09red/mmu:13614%09red/mmu:320207%09red/mmu:18035%09red/mmu:20310%09red/mmu:19225%09red/mmu:74568%09red/mmu:20304%09red/mmu:16878%09red/mmu:14102%09red/mmu:11911%…
Salmonella infection	KEGG PATHWAY	mmu05132	38	79	2.38324e-05	0.00158094	ENSMUSG00000020009|ENSMUSG00000024290|ENSMUSG00000006304|ENSMUSG00000031165|ENSMUSG00000029380|ENSMUSG00000068699|ENSMUSG00000020826|ENSMUSG00000052684|ENSMUSG00000024927|ENSMUSG00000029622|ENSMUSG00000029621|ENSMUSG00000032508|ENSMUSG00000018293|ENSMUSG00000004591|ENSMUSG00000016024|ENSMUSG00000039005|ENSMUSG00000029465|ENSMUSG00000021250|ENSMUSG00000028868|ENSMUSG00000058427|ENSMUSG00000062825|…	mmu:15979|mmu:19877|mmu:76709|mmu:22376|mmu:14825|mmu:68794|mmu:18126|mmu:16476|mmu:19697|mmu:11867|mmu:56443|mmu:17874|mmu:18643|mmu:109333|mmu:16803|mmu:21898|mmu:56378|mmu:14281|mmu:242687|mmu:20310|mmu:11465|mmu:330122|mmu:67771|mmu:16175|mmu:16176|mmu:21872|mmu:20302|mmu:12362|mmu:263803|mmu:192176|mmu:18033|mmu:434782|mmu:12475|mmu:26416|mmu:16193|mmu:12981|mmu:20303|mmu:19878|	15979|19877|76709|22376|14825|68794|18126|16476|19697|11867|56443|17874|18643|109333|16803|21898|56378|14281|242687|20310|11465|330122|67771|16175|16176|21872|20302|12362|263803|192176|18033|434782|12475|26416|16193|12981|20303|19878|	http://www.genome.jp/kegg-bin/show_pathway?mmu05132/mmu:21872%09red/mmu:22376%09red/mmu:18643%09red/mmu:19697%09red/mmu:192176%09red/mmu:109333%09red/mmu:16193%09red/mmu:15979%09red/mmu:26416%09red/mmu:68794%09red/mmu:18033%09red/mmu:21898%09red/mmu:12475%09red/mmu:20310%09red/mmu:76709%09red/mmu:19877%09red/mmu:18126%09red/mmu:19878%09red/mmu:17874%09red/mmu:16476%09red/mmu:14825%09red/mmu:12981…
NF-kappa B signaling pathway	KEGG PATHWAY	mmu04064	44	100	3.14891e-05	0.00158094	ENSMUSG00000099974|ENSMUSG00000030339|ENSMUSG00000030172|ENSMUSG00000103439|ENSMUSG00000031264|ENSMUSG00000032487|ENSMUSG00000000275|ENSMUSG00000102037|ENSMUSG00000059883|ENSMUSG00000017652|ENSMUSG00000005824|ENSMUSG00000024927|ENSMUSG00000037405|ENSMUSG00000032508|ENSMUSG00000061353|ENSMUSG00000022015|ENSMUSG00000016024|ENSMUSG00000002983|ENSMUSG00000089929|ENSMUSG00000021025|ENSMUSG00000024401|…	mmu:12047|mmu:17000|mmu:111173|mmu:11796|mmu:12229|mmu:19225|mmu:217069|mmu:12044|mmu:266632|mmu:21939|mmu:50930|mmu:19697|mmu:15894|mmu:17874|mmu:20315|mmu:21943|mmu:16803|mmu:19698|mmu:12045|mmu:18035|mmu:21926|mmu:17873|mmu:21898|mmu:19766|mmu:18034|mmu:234779|mmu:20310|mmu:21937|mmu:16176|mmu:20963|mmu:17096|mmu:11797|mmu:18792|mmu:18033|mmu:230073|mmu:12475|mmu:12633|mmu:11796|mmu:53859|mmu:…	12047|17000|111173|11796|12229|19225|217069|12044|266632|21939|50930|19697|15894|17874|20315|21943|16803|19698|12045|18035|21926|17873|21898|19766|18034|234779|20310|21937|16176|20963|17096|11797|18792|18033|230073|12475|12633|11796|53859|12048|20303|16177|117149|21929|	http://www.genome.jp/kegg-bin/show_pathway?mmu04064/mmu:217069%09red/mmu:12048%09red/mmu:12047%09red/mmu:12045%09red/mmu:21943%09red/mmu:21929%09red/mmu:19697%09red/mmu:19698%09red/mmu:21926%09red/mmu:12633%09red/mmu:18033%09red/mmu:18034%09red/mmu:18035%09red/mmu:12475%09red/mmu:20310%09red/mmu:21898%09red/mmu:19225%09red/mmu:16177%09red/mmu:17873%09red/mmu:17874%09red/mmu:53859%09red/mmu:11796%…
Transcriptional misregulation in cancer	KEGG PATHWAY	mmu05202	66	178	3.55267e-05	0.00158094	ENSMUSG00000099974|ENSMUSG00000009376|ENSMUSG00000016087|ENSMUSG00000103439|ENSMUSG00000002111|ENSMUSG00000037992|ENSMUSG00000023067|ENSMUSG00000021822|ENSMUSG00000025856|ENSMUSG00000066687|ENSMUSG00000036986|ENSMUSG00000059552|ENSMUSG00000022508|ENSMUSG00000025746|ENSMUSG00000056501|ENSMUSG00000028341|ENSMUSG00000031613|ENSMUSG00000017652|ENSMUSG00000011960|ENSMUSG00000005533|ENSMUSG00000059436|…	mmu:12047|mmu:17295|mmu:14247|mmu:11796|mmu:20375|mmu:19401|mmu:12575|mmu:18792|mmu:18590|mmu:235320|mmu:18854|mmu:22059|mmu:12053|mmu:16193|mmu:12608|mmu:18124|mmu:15446|mmu:21939|mmu:12455|mmu:16001|mmu:17187|mmu:19697|mmu:66629|mmu:17869|mmu:17392|mmu:21813|mmu:20732|mmu:14254|mmu:18791|mmu:13714|mmu:14129|mmu:67603|mmu:12394|mmu:12045|mmu:80859|mmu:19696|mmu:12606|mmu:140780|mmu:12524|mmu:164…	12047|17295|14247|11796|20375|19401|12575|18792|18590|235320|18854|22059|12053|16193|12608|18124|15446|21939|12455|16001|17187|19697|66629|17869|17392|21813|20732|14254|18791|13714|14129|67603|12394|12045|80859|19696|12606|140780|12524|16409|56458|12048|16009|17246|15078|15078|17355|17125|18510|12444|56312|13876|14011|15364|12475|93735|18033|12044|11908|11796|15902|12981|13714|16178|50701|108829|	http://www.genome.jp/kegg-bin/show_pathway?mmu05202/mmu:15446%09red/mmu:12048%09red/mmu:108829%09red/mmu:16409%09red/mmu:14011%09red/mmu:15364%09red/mmu:12047%09red/mmu:12045%09red/mmu:12044%09red/mmu:18854%09red/mmu:93735%09red/mmu:19697%09red/mmu:19696%09red/mmu:16193%09red/mmu:12475%09red/mmu:12394%09red/mmu:56458%09red/mmu:20375%09red/mmu:14247%09red/mmu:12575%09red/mmu:235320%09red/mmu:18033…
Focal adhesion	KEGG PATHWAY	mmu04510	73	207	5.33321e-05	0.00203424	ENSMUSG00000022836|ENSMUSG00000034165|ENSMUSG00000103439|ENSMUSG00000033220|ENSMUSG00000022438|ENSMUSG00000027111|ENSMUSG00000028364|ENSMUSG00000001930|ENSMUSG00000025856|ENSMUSG00000068699|ENSMUSG00000026509|ENSMUSG00000029306|ENSMUSG00000027087|ENSMUSG00000028864|ENSMUSG00000026193|ENSMUSG00000029304|ENSMUSG00000004056|ENSMUSG00000052681|ENSMUSG00000030403|ENSMUSG00000024290|ENSMUSG00000000555|…	mmu:107589|mmu:12445|mmu:11796|mmu:19354|mmu:170736|mmu:16403|mmu:21923|mmu:22371|mmu:18590|mmu:68794|mmu:12334|mmu:15891|mmu:16410|mmu:15234|mmu:14268|mmu:20750|mmu:11652|mmu:215449|mmu:22323|mmu:19877|mmu:16402|mmu:16782|mmu:16398|mmu:16777|mmu:16399|mmu:18591|mmu:18596|mmu:14254|mmu:109700|mmu:109711|mmu:226519|mmu:12443|mmu:16001|mmu:22330|mmu:21826|mmu:12444|mmu:21828|mmu:20416|mmu:13367|mmu…	107589|12445|11796|19354|170736|16403|21923|22371|18590|68794|12334|15891|16410|15234|14268|20750|11652|215449|22323|19877|16402|16782|16398|16777|16399|18591|18596|14254|109700|109711|226519|12443|16001|22330|21826|12444|21828|20416|13367|67268|60595|22324|22793|16412|16476|14257|16403|11465|18654|53867|21894|17295|16542|54635|320910|224105|330662|21825|320207|12824|192176|12827|12826|98932|1386…	http://www.genome.jp/kegg-bin/show_pathway?mmu04510/mmu:224105%09red/mmu:16775%09red/mmu:22330%09red/mmu:16776%09red/mmu:16542%09red/mmu:12334%09red/mmu:15234%09red/mmu:22371%09red/mmu:16403%09red/mmu:16402%09red/mmu:16399%09red/mmu:16398%09red/mmu:11796%09red/mmu:21923%09red/mmu:21826%09red/mmu:21825%09red/mmu:22793%09red/mmu:170736%09red/mmu:16476%09red/mmu:13866%09red/mmu:16202%09red/mmu:22323…
Leishmaniasis	KEGG PATHWAY	mmu05140	32	65	7.22097e-05	0.00241	ENSMUSG00000020009|ENSMUSG00000059498|ENSMUSG00000032487|ENSMUSG00000059089|ENSMUSG00000047945|ENSMUSG00000020826|ENSMUSG00000006519|ENSMUSG00000024927|ENSMUSG00000032508|ENSMUSG00000004266|ENSMUSG00000015947|ENSMUSG00000026104|ENSMUSG00000021025|ENSMUSG00000024401|ENSMUSG00000052684|ENSMUSG00000021250|ENSMUSG00000071715|ENSMUSG00000026480|ENSMUSG00000030786|ENSMUSG00000021253|ENSMUSG00000025809|…	mmu:15979|mmu:14131|mmu:19225|mmu:246256|mmu:17357|mmu:18126|mmu:13057|mmu:19697|mmu:17874|mmu:15170|mmu:14129|mmu:20846|mmu:18035|mmu:21926|mmu:16476|mmu:14281|mmu:17972|mmu:17970|mmu:16409|mmu:21809|mmu:16412|mmu:266632|mmu:21808|mmu:16452|mmu:16175|mmu:16176|mmu:16414|mmu:24088|mmu:18033|mmu:26416|mmu:17969|mmu:21898|	15979|14131|19225|246256|17357|18126|13057|19697|17874|15170|14129|20846|18035|21926|16476|14281|17972|17970|16409|21809|16412|266632|21808|16452|16175|16176|16414|24088|18033|26416|17969|21898|	http://www.genome.jp/kegg-bin/show_pathway?mmu05140/mmu:14131%09red/mmu:16409%09red/mmu:21809%09red/mmu:21808%09red/mmu:19697%09red/mmu:21926%09red/mmu:15979%09red/mmu:26416%09red/mmu:18033%09red/mmu:18035%09red/mmu:15170%09red/mmu:17970%09red/mmu:17972%09red/mmu:19225%09red/mmu:20846%09red/mmu:18126%09red/mmu:17874%09red/mmu:16452%09red/mmu:16476%09red/mmu:16412%09red/mmu:16414%09red/mmu:16175%0…
Cytokine-cytokine receptor interaction	KEGG PATHWAY	mmu04060	86	264	0.00012146	0.00360333	ENSMUSG00000025856|ENSMUSG00000016524|ENSMUSG00000044337|ENSMUSG00000031779|ENSMUSG00000061353|ENSMUSG00000019966|ENSMUSG00000022074|ENSMUSG00000027947|ENSMUSG00000039239|ENSMUSG00000058427|ENSMUSG00000000489|ENSMUSG00000027399|ENSMUSG00000027398|ENSMUSG00000035042|ENSMUSG00000000982|ENSMUSG00000004371|ENSMUSG00000014599|ENSMUSG00000027358|ENSMUSG00000002897|ENSMUSG00000024778|ENSMUSG00000023905|…	mmu:18590|mmu:329244|mmu:12778|mmu:20299|mmu:20315|mmu:17311|mmu:21933|mmu:16194|mmu:21808|mmu:20310|mmu:18591|mmu:16175|mmu:16176|mmu:20304|mmu:20302|mmu:16156|mmu:12977|mmu:12156|mmu:16172|mmu:14102|mmu:27279|mmu:230979|mmu:16590|mmu:21943|mmu:16880|mmu:20293|mmu:11477|mmu:14257|mmu:15945|mmu:54635|mmu:245527|mmu:14825|mmu:16164|mmu:16323|mmu:18414|mmu:12981|mmu:12774|mmu:12985|mmu:17295|mmu:16…	18590|329244|12778|20299|20315|17311|21933|16194|21808|20310|18591|16175|16176|20304|20302|16156|12977|12156|16172|14102|27279|230979|16590|21943|16880|20293|11477|14257|15945|54635|245527|14825|16164|16323|18414|12981|12774|12985|17295|16195|20308|50930|16186|18596|15234|20305|12772|12983|12983|20306|12768|21809|16180|12765|20311|56744|57349|21950|21942|15975|16155|20303|15979|17000|21949|18413|…	http://www.genome.jp/kegg-bin/show_pathway?mmu04060/mmu:17311%09red/mmu:56708%09red/mmu:21949%09red/mmu:57349%09red/mmu:15234%09red/mmu:16542%09red/mmu:230979%09red/mmu:21942%09red/mmu:21943%09red/mmu:21809%09red/mmu:21808%09red/mmu:15975%09red/mmu:21813%09red/mmu:11477%09red/mmu:16190%09red/mmu:16193%09red/mmu:21926%09red/mmu:16180%09red/mmu:16174%09red/mmu:12145%09red/mmu:12774%09red/mmu:20315%…
Pathways in cancer	KEGG PATHWAY	mmu05200	100	323	0.000172728	0.00461184	ENSMUSG00000103439|ENSMUSG00000006005|ENSMUSG00000025856|ENSMUSG00000059552|ENSMUSG00000034957|ENSMUSG00000002250|ENSMUSG00000084899|ENSMUSG00000021250|ENSMUSG00000004056|ENSMUSG00000070348|ENSMUSG00000019966|ENSMUSG00000021109|ENSMUSG00000041075|ENSMUSG00000019846|ENSMUSG00000027940|ENSMUSG00000037815|ENSMUSG00000039239|ENSMUSG00000020184|ENSMUSG00000000489|ENSMUSG00000085057|ENSMUSG00000057367|…	mmu:11796|mmu:108989|mmu:18590|mmu:22059|mmu:12606|mmu:19015|mmu:22027|mmu:14281|mmu:11652|mmu:12443|mmu:17311|mmu:15251|mmu:14369|mmu:16775|mmu:59069|mmu:12385|mmu:21808|mmu:17246|mmu:18591|mmu:18510|mmu:11797|mmu:12575|mmu:12826|mmu:12156|mmu:234779|mmu:14102|mmu:22419|mmu:19730|mmu:19401|mmu:12827|mmu:18854|mmu:14182|mmu:20525|mmu:12402|mmu:12370|mmu:17127|mmu:14370|mmu:16410|mmu:110279|mmu:16…	11796|108989|18590|22059|12606|19015|22027|14281|11652|12443|17311|15251|14369|16775|59069|12385|21808|17246|18591|18510|11797|12575|12826|12156|234779|14102|22419|19730|19401|12827|18854|14182|20525|12402|12370|17127|14370|16410|110279|16653|18709|18654|208650|12550|11796|17295|20375|235320|15234|14268|18126|56289|67673|18596|20525|19225|18034|18035|16776|21809|56458|16403|76551|16777|320207|138…	http://www.genome.jp/kegg-bin/show_pathway?mmu05200/mmu:16775%09red/mmu:14013%09red/mmu:16777%09red/mmu:16776%09red/mmu:19730%09red/mmu:67673%09red/mmu:18854%09red/mmu:19697%09red/mmu:21813%09red/mmu:64143%09red/mmu:13866%09red/mmu:14369%09red/mmu:14366%09red/mmu:12827%09red/mmu:12826%09red/mmu:15251%09red/mmu:76551%09red/mmu:22419%09red/mmu:17869%09red/mmu:16842%09red/mmu:56289%09red/mmu:19354%0…
Toll-like receptor signaling pathway	KEGG PATHWAY	mmu04620	41	101	0.000227837	0.0053042	ENSMUSG00000029771|ENSMUSG00000044827|ENSMUSG00000059883|ENSMUSG00000029304|ENSMUSG00000025139|ENSMUSG00000002948|ENSMUSG00000017652|ENSMUSG00000052684|ENSMUSG00000024927|ENSMUSG00000026029|ENSMUSG00000032508|ENSMUSG00000004056|ENSMUSG00000051439|ENSMUSG00000024235|ENSMUSG00000016024|ENSMUSG00000026104|ENSMUSG00000021025|ENSMUSG00000024401|ENSMUSG00000075122|ENSMUSG00000039005|ENSMUSG00000021408|…	mmu:27056|mmu:21897|mmu:266632|mmu:20750|mmu:54473|mmu:26400|mmu:21939|mmu:16476|mmu:19697|mmu:12370|mmu:17874|mmu:11652|mmu:12475|mmu:26410|mmu:16803|mmu:20846|mmu:18035|mmu:21926|mmu:12519|mmu:21898|mmu:19766|mmu:16193|mmu:12524|mmu:14281|mmu:21899|mmu:170743|mmu:15945|mmu:16176|mmu:20304|mmu:20302|mmu:320207|mmu:24088|mmu:170744|mmu:18033|mmu:54123|mmu:26416|mmu:15975|mmu:18709|mmu:26397|mmu:2…	27056|21897|266632|20750|54473|26400|21939|16476|19697|12370|17874|11652|12475|26410|16803|20846|18035|21926|12519|21898|19766|16193|12524|14281|21899|170743|15945|16176|20304|20302|320207|24088|170744|18033|54123|26416|15975|18709|26397|20303|117149|	http://www.genome.jp/kegg-bin/show_pathway?mmu04620/mmu:18033%09red/mmu:12370%09red/mmu:15975%09red/mmu:19697%09red/mmu:18709%09red/mmu:12519%09red/mmu:16193%09red/mmu:21926%09red/mmu:26416%09red/mmu:26410%09red/mmu:320207%09red/mmu:18035%09red/mmu:12475%09red/mmu:20302%09red/mmu:20846%09red/mmu:117149%09red/mmu:17874%09red/mmu:20304%09red/mmu:16476%09red/mmu:21897%09red/mmu:21898%09red/mmu:21899…
Measles	KEGG PATHWAY	mmu05162	51	137	0.000238391	0.0053042	ENSMUSG00000020009|ENSMUSG00000032661|ENSMUSG00000034165|ENSMUSG00000066861|ENSMUSG00000026656|ENSMUSG00000024079|ENSMUSG00000002325|ENSMUSG00000031207|ENSMUSG00000059552|ENSMUSG00000031805|ENSMUSG00000031304|ENSMUSG00000024927|ENSMUSG00000032508|ENSMUSG00000090877|ENSMUSG00000023341|ENSMUSG00000004056|ENSMUSG00000070348|ENSMUSG00000022074|ENSMUSG00000021025|ENSMUSG00000052776|ENSMUSG00000000184|…	mmu:15979|mmu:246727|mmu:12445|mmu:23960|mmu:14130|mmu:19106|mmu:16391|mmu:17698|mmu:22059|mmu:16453|mmu:16186|mmu:19697|mmu:17874|mmu:15511|mmu:17858|mmu:11652|mmu:12443|mmu:21933|mmu:18035|mmu:246730|mmu:12444|mmu:21898|mmu:12571|mmu:266632|mmu:14694|mmu:16193|mmu:170786|mmu:20846|mmu:16452|mmu:170743|mmu:16175|mmu:16176|mmu:208650|mmu:23961|mmu:193740|mmu:71586|mmu:13448|mmu:320207|mmu:20850|m…	15979|246727|12445|23960|14130|19106|16391|17698|22059|16453|16186|19697|17874|15511|17858|11652|12443|21933|18035|246730|12444|21898|12571|266632|14694|16193|170786|20846|16452|170743|16175|16176|208650|23961|193740|71586|13448|320207|20850|20848|18033|230073|246728|54123|20847|15975|18709|13665|24088|14102|21929|	http://www.genome.jp/kegg-bin/show_pathway?mmu05162/mmu:12571%09red/mmu:18033%09red/mmu:14130%09red/mmu:16391%09red/mmu:193740%09red/mmu:13448%09red/mmu:12443%09red/mmu:18709%09red/mmu:208650%09red/mmu:21929%09red/mmu:19697%09red/mmu:246727%09red/mmu:246728%09red/mmu:16193%09red/mmu:71586%09red/mmu:15979%09red/mmu:19106%09red/mmu:320207%09red/mmu:18035%09red/mmu:20848%09red/mmu:17858%09red/mmu:20…
Influenza A	KEGG PATHWAY	mmu05164	59	170	0.000365558	0.00750801	ENSMUSG00000020009|ENSMUSG00000032661|ENSMUSG00000066861|ENSMUSG00000000275|ENSMUSG00000021025|ENSMUSG00000034855|ENSMUSG00000024079|ENSMUSG00000030530|ENSMUSG00000036986|ENSMUSG00000018362|ENSMUSG00000002325|ENSMUSG00000002948|ENSMUSG00000024810|ENSMUSG00000063550|ENSMUSG00000024927|ENSMUSG00000037405|ENSMUSG00000026104|ENSMUSG00000032508|ENSMUSG00000090877|ENSMUSG00000023341|ENSMUSG00000004056|…	mmu:15979|mmu:246727|mmu:23960|mmu:217069|mmu:18035|mmu:15945|mmu:19106|mmu:18550|mmu:18854|mmu:16647|mmu:16391|mmu:26400|mmu:77125|mmu:269966|mmu:19697|mmu:15894|mmu:20846|mmu:17874|mmu:15511|mmu:17858|mmu:11652|mmu:100037258|mmu:12702|mmu:20296|mmu:21933|mmu:20293|mmu:21926|mmu:16476|mmu:21898|mmu:266632|mmu:16193|mmu:117198|mmu:21937|mmu:320207|mmu:16452|mmu:170743|mmu:246730|mmu:16175|mmu:161…	15979|246727|23960|217069|18035|15945|19106|18550|18854|16647|16391|26400|77125|269966|19697|15894|20846|17874|15511|17858|11652|100037258|12702|20296|21933|20293|21926|16476|21898|266632|16193|117198|21937|320207|16452|170743|246730|16175|16176|23961|193740|71586|20304|12362|11465|54123|18033|230073|246728|216799|15463|58185|20847|26416|15975|18709|26397|13665|14102|	http://www.genome.jp/kegg-bin/show_pathway?mmu05164/mmu:217069%09red/mmu:23960%09red/mmu:320207%09red/mmu:16391%09red/mmu:193740%09red/mmu:18709%09red/mmu:13665%09red/mmu:26400%09red/mmu:18854%09red/mmu:15975%09red/mmu:19697%09red/mmu:246727%09red/mmu:246728%09red/mmu:16193%09red/mmu:71586%09red/mmu:21926%09red/mmu:15979%09red/mmu:58185%09red/mmu:77125%09red/mmu:19106%09red/mmu:18033%09red/mmu:18…
Leukocyte transendothelial migration	KEGG PATHWAY	mmu04670	45	121	0.000543488	0.00986851	ENSMUSG00000024290|ENSMUSG00000020717|ENSMUSG00000052397|ENSMUSG00000031207|ENSMUSG00000029204|ENSMUSG00000052681|ENSMUSG00000053436|ENSMUSG00000030403|ENSMUSG00000006519|ENSMUSG00000037405|ENSMUSG00000041378|ENSMUSG00000066058|ENSMUSG00000061353|ENSMUSG00000000001|ENSMUSG00000054892|ENSMUSG00000021823|ENSMUSG00000037815|ENSMUSG00000015143|ENSMUSG00000071715|ENSMUSG00000024048|ENSMUSG00000001946|…	mmu:19877|mmu:18613|mmu:22350|mmu:17698|mmu:74734|mmu:215449|mmu:26416|mmu:22323|mmu:13057|mmu:15894|mmu:12741|mmu:242653|mmu:20315|mmu:14679|mmu:22165|mmu:22330|mmu:12385|mmu:109711|mmu:17972|mmu:67268|mmu:69524|mmu:60595|mmu:22324|mmu:17970|mmu:16409|mmu:16412|mmu:18709|mmu:13058|mmu:11465|mmu:56173|mmu:19247|mmu:19229|mmu:16408|mmu:16414|mmu:19354|mmu:223864|mmu:98932|mmu:12388|mmu:320207|mmu:…	19877|18613|22350|17698|74734|215449|26416|22323|13057|15894|12741|242653|20315|14679|22165|22330|12385|109711|17972|67268|69524|60595|22324|17970|16409|16412|18709|13058|11465|56173|19247|19229|16408|16414|19354|223864|98932|12388|320207|12562|17969|234779|18260|19878|60363|	http://www.genome.jp/kegg-bin/show_pathway?mmu04670/mmu:22350%09red/mmu:242653%09red/mmu:215449%09red/mmu:16409%09red/mmu:16408%09red/mmu:56173%09red/mmu:18709%09red/mmu:26416%09red/mmu:19247%09red/mmu:22330%09red/mmu:12562%09red/mmu:74734%09red/mmu:320207%09red/mmu:17970%09red/mmu:17972%09red/mmu:19877%09red/mmu:20315%09red/mmu:223864%09red/mmu:19229%09red/mmu:69524%09red/mmu:22324%09red/mmu:164…
Apoptosis	KEGG PATHWAY	mmu04210	34	82	0.000554411	0.00986851	ENSMUSG00000031834|ENSMUSG00000103439|ENSMUSG00000025887|ENSMUSG00000059552|ENSMUSG00000024927|ENSMUSG00000026029|ENSMUSG00000032508|ENSMUSG00000004056|ENSMUSG00000022074|ENSMUSG00000021025|ENSMUSG00000024401|ENSMUSG00000020227|ENSMUSG00000071714|ENSMUSG00000059883|ENSMUSG00000021408|ENSMUSG00000030341|ENSMUSG00000022514|ENSMUSG00000026509|ENSMUSG00000071713|ENSMUSG00000027399|ENSMUSG00000027398|…	mmu:18709|mmu:11796|mmu:12364|mmu:22059|mmu:19697|mmu:12370|mmu:17874|mmu:11652|mmu:21933|mmu:18035|mmu:21926|mmu:73914|mmu:12983|mmu:266632|mmu:19766|mmu:21937|mmu:16180|mmu:12334|mmu:12983|mmu:16175|mmu:16176|mmu:19057|mmu:320207|mmu:18033|mmu:19108|mmu:18049|mmu:11797|mmu:12633|mmu:11796|mmu:53859|mmu:108960|mmu:12048|mmu:16177|mmu:14102|	18709|11796|12364|22059|19697|12370|17874|11652|21933|18035|21926|73914|12983|266632|19766|21937|16180|12334|12983|16175|16176|19057|320207|18033|19108|18049|11797|12633|11796|53859|108960|12048|16177|14102|	http://www.genome.jp/kegg-bin/show_pathway?mmu04210/mmu:18033%09red/mmu:108960%09red/mmu:12334%09red/mmu:12370%09red/mmu:12048%09red/mmu:19697%09red/mmu:18709%09red/mmu:21926%09red/mmu:16180%09red/mmu:73914%09red/mmu:12633%09red/mmu:320207%09red/mmu:18035%09red/mmu:19057%09red/mmu:17874%09red/mmu:14102%09red/mmu:16176%09red/mmu:12983%09red/mmu:19108%09red/mmu:11652%09red/mmu:12364%09red/mmu:21933…
Bacterial invasion of epithelial cells	KEGG PATHWAY	mmu05100	32	77	0.000769375	0.0128389	ENSMUSG00000041112|ENSMUSG00000022831|ENSMUSG00000009376|ENSMUSG00000031165|ENSMUSG00000026193|ENSMUSG00000036885|ENSMUSG00000059248|ENSMUSG00000058325|ENSMUSG00000034342|ENSMUSG00000000555|ENSMUSG00000029621|ENSMUSG00000033335|ENSMUSG00000006304|ENSMUSG00000021823|ENSMUSG00000037815|ENSMUSG00000042626|ENSMUSG00000029622|ENSMUSG00000029465|ENSMUSG00000025809|ENSMUSG00000028868|ENSMUSG00000062825|…	mmu:140580|mmu:15163|mmu:17295|mmu:22376|mmu:14268|mmu:622434|mmu:53860|mmu:330662|mmu:12402|mmu:16402|mmu:56443|mmu:13430|mmu:76709|mmu:22330|mmu:12385|mmu:20416|mmu:11867|mmu:56378|mmu:16412|mmu:242687|mmu:11465|mmu:52398|mmu:67771|mmu:208650|mmu:622434|mmu:13043|mmu:12550|mmu:320207|mmu:434782|mmu:18709|mmu:16202|mmu:271849|	140580|15163|17295|22376|14268|622434|53860|330662|12402|16402|56443|13430|76709|22330|12385|20416|11867|56378|16412|242687|11465|52398|67771|208650|622434|13043|12550|320207|434782|18709|16202|271849|	http://www.genome.jp/kegg-bin/show_pathway?mmu05100/mmu:434782%09red/mmu:22330%09red/mmu:18709%09red/mmu:22376%09red/mmu:16402%09red/mmu:208650%09red/mmu:67771%09red/mmu:15163%09red/mmu:12385%09red/mmu:140580%09red/mmu:14268%09red/mmu:320207%09red/mmu:622434%09red/mmu:13043%09red/mmu:16412%09red/mmu:13430%09red/mmu:52398%09red/mmu:330662%09red/mmu:12550%09red/mmu:11465%09red/mmu:12402%09red/mmu:1…
Toxoplasmosis	KEGG PATHWAY	mmu05145	42	113	0.000822449	0.0129173	ENSMUSG00000020009|ENSMUSG00000031834|ENSMUSG00000103439|ENSMUSG00000020826|ENSMUSG00000017652|ENSMUSG00000053436|ENSMUSG00000024927|ENSMUSG00000004040|ENSMUSG00000026479|ENSMUSG00000026478|ENSMUSG00000026029|ENSMUSG00000032508|ENSMUSG00000090877|ENSMUSG00000000001|ENSMUSG00000002900|ENSMUSG00000004056|ENSMUSG00000032000|ENSMUSG00000015647|ENSMUSG00000026104|ENSMUSG00000021025|ENSMUSG00000024401|…	mmu:15979|mmu:18709|mmu:11796|mmu:18126|mmu:21939|mmu:26416|mmu:19697|mmu:20848|mmu:16782|mmu:226519|mmu:12370|mmu:17874|mmu:15511|mmu:14679|mmu:16777|mmu:11652|mmu:11796|mmu:16776|mmu:20846|mmu:18035|mmu:21926|mmu:16403|mmu:21898|mmu:21809|mmu:16412|mmu:266632|mmu:21808|mmu:21937|mmu:16403|mmu:16145|mmu:16452|mmu:193740|mmu:320207|mmu:24088|mmu:18033|mmu:11797|mmu:12703|mmu:16775|mmu:12048|mmu:1…	15979|18709|11796|18126|21939|26416|19697|20848|16782|226519|12370|17874|15511|14679|16777|11652|11796|16776|20846|18035|21926|16403|21898|21809|16412|266632|21808|21937|16403|16145|16452|193740|320207|24088|18033|11797|12703|16775|12048|16155|26397|12774|	http://www.genome.jp/kegg-bin/show_pathway?mmu05145/mmu:320207%09red/mmu:16775%09red/mmu:16777%09red/mmu:16776%09red/mmu:16403%09red/mmu:21809%09red/mmu:12370%09red/mmu:12048%09red/mmu:19697%09red/mmu:18709%09red/mmu:21926%09red/mmu:15979%09red/mmu:12774%09red/mmu:18033%09red/mmu:18035%09red/mmu:20848%09red/mmu:20846%09red/mmu:16145%09red/mmu:17874%09red/mmu:16452%09red/mmu:193740%09red/mmu:16412…
Proteoglycans in cancer	KEGG PATHWAY	mmu05205	66	205	0.000892653	0.013241	ENSMUSG00000030170|ENSMUSG00000055723|ENSMUSG00000024290|ENSMUSG00000022831|ENSMUSG00000009376|ENSMUSG00000031207|ENSMUSG00000005087|ENSMUSG00000068699|ENSMUSG00000037225|ENSMUSG00000041075|ENSMUSG00000026193|ENSMUSG00000059552|ENSMUSG00000025351|ENSMUSG00000053436|ENSMUSG00000031565|ENSMUSG00000028763|ENSMUSG00000005533|ENSMUSG00000034342|ENSMUSG00000000555|ENSMUSG00000024486|ENSMUSG00000022346|…	mmu:22419|mmu:66922|mmu:19877|mmu:15163|mmu:17295|mmu:17698|mmu:12505|mmu:68794|mmu:14173|mmu:14369|mmu:14268|mmu:22059|mmu:12512|mmu:26416|mmu:14182|mmu:15530|mmu:16001|mmu:12402|mmu:16402|mmu:15200|mmu:17869|mmu:15170|mmu:18793|mmu:15234|mmu:11652|mmu:12443|mmu:19247|mmu:15251|mmu:12512|mmu:21926|mmu:14370|mmu:20969|mmu:16410|mmu:20971|mmu:22350|mmu:18792|mmu:16653|mmu:16412|mmu:18709|mmu:21808…	22419|66922|19877|15163|17295|17698|12505|68794|14173|14369|14268|22059|12512|26416|14182|15530|16001|12402|16402|15200|17869|15170|18793|15234|11652|12443|19247|15251|12512|21926|14370|20969|16410|20971|22350|18792|16653|16412|18709|21808|17246|11465|29875|208650|16398|16542|13039|13043|18176|20130|21825|320207|93735|20848|192176|12575|19108|19878|13866|74055|20104|234779|21898|24088|14102|14366|	http://www.genome.jp/kegg-bin/show_pathway?mmu05205/mmu:22350%09red/mmu:16653%09red/mmu:18176%09red/mmu:12575%09red/mmu:26416%09red/mmu:16542%09red/mmu:14173%09red/mmu:18709%09red/mmu:16402%09red/mmu:16398%09red/mmu:21808%09red/mmu:208650%09red/mmu:12512%09red/mmu:14366%09red/mmu:192176%09red/mmu:21825%09red/mmu:20971%09red/mmu:21926%09red/mmu:66922%09red/mmu:13866%09red/mmu:14369%09red/mmu:19247…
Legionellosis	KEGG PATHWAY	mmu05134	26	58	0.00098306	0.0138146	ENSMUSG00000029380|ENSMUSG00000091549|ENSMUSG00000024927|ENSMUSG00000026029|ENSMUSG00000032508|ENSMUSG00000090877|ENSMUSG00000025225|ENSMUSG00000021025|ENSMUSG00000024401|ENSMUSG00000039005|ENSMUSG00000030786|ENSMUSG00000058427|ENSMUSG00000020088|ENSMUSG00000029379|ENSMUSG00000027398|ENSMUSG00000091971|ENSMUSG00000083327|ENSMUSG00000025980|ENSMUSG00000025888|ENSMUSG00000078945|ENSMUSG00000000290|…	mmu:14825|mmu:13627|mmu:19697|mmu:12370|mmu:17874|mmu:15511|mmu:18034|mmu:18035|mmu:21926|mmu:21898|mmu:16409|mmu:20310|mmu:20224|mmu:330122|mmu:16176|mmu:193740|mmu:269523|mmu:15510|mmu:12362|mmu:17948|mmu:16414|mmu:12475|mmu:24088|mmu:18033|mmu:13627|mmu:16193|	14825|13627|19697|12370|17874|15511|18034|18035|21926|21898|16409|20310|20224|330122|16176|193740|269523|15510|12362|17948|16414|12475|24088|18033|13627|16193|	http://www.genome.jp/kegg-bin/show_pathway?mmu05134/mmu:16409%09red/mmu:12370%09red/mmu:269523%09red/mmu:19697%09red/mmu:16193%09red/mmu:21926%09red/mmu:18033%09red/mmu:18034%09red/mmu:18035%09red/mmu:12475%09red/mmu:20310%09red/mmu:21898%09red/mmu:17874%09red/mmu:16176%09red/mmu:193740%09red/mmu:16414%09red/mmu:14825%09red/mmu:330122%09red/mmu:12362%09red/mmu:24088%09red/mmu:13627%09red/mmu:1794…
PI3K-Akt signaling pathway	KEGG PATHWAY	mmu04151	101	351	0.00127	0.0169544	ENSMUSG00000025856|ENSMUSG00000043154|ENSMUSG00000027381|ENSMUSG00000059552|ENSMUSG00000031465|ENSMUSG00000084899|ENSMUSG00000004591|ENSMUSG00000042284|ENSMUSG00000004056|ENSMUSG00000070348|ENSMUSG00000019966|ENSMUSG00000023885|ENSMUSG00000025915|ENSMUSG00000019846|ENSMUSG00000038612|ENSMUSG00000027947|ENSMUSG00000020184|ENSMUSG00000000489|ENSMUSG00000006445|ENSMUSG00000025321|ENSMUSG00000040152|…	mmu:18590|mmu:235542|mmu:12125|mmu:22059|mmu:11601|mmu:22027|mmu:109333|mmu:109700|mmu:11652|mmu:12443|mmu:17311|mmu:21826|mmu:170755|mmu:16775|mmu:17210|mmu:16194|mmu:17246|mmu:18591|mmu:13836|mmu:320910|mmu:21825|mmu:12977|mmu:12824|mmu:12827|mmu:12826|mmu:263803|mmu:74747|mmu:12575|mmu:13636|mmu:20750|mmu:15891|mmu:14182|mmu:16402|mmu:18033|mmu:16453|mmu:16410|mmu:16653|mmu:13685|mmu:14257|mmu…	18590|235542|12125|22059|11601|22027|109333|109700|11652|12443|17311|21826|170755|16775|17210|16194|17246|18591|13836|320910|21825|12977|12824|12827|12826|263803|74747|12575|13636|20750|15891|14182|16402|18033|16453|16410|16653|13685|14257|18654|53867|14701|54635|11911|16452|18414|20104|12985|17295|12445|20963|83490|14268|16186|13684|26427|18596|15234|15370|18127|22631|16776|16412|16403|16777|320…	http://www.genome.jp/kegg-bin/show_pathway?mmu04151/mmu:13684%09red/mmu:13685%09red/mmu:16775%09red/mmu:16777%09red/mmu:16776%09red/mmu:235542%09red/mmu:15975%09red/mmu:19697%09red/mmu:14186%09red/mmu:109333%09red/mmu:21923%09red/mmu:12824%09red/mmu:12827%09red/mmu:12826%09red/mmu:14701%09red/mmu:52432%09red/mmu:14254%09red/mmu:14257%09red/mmu:54635%09red/mmu:20104%09red/mmu:74747%09red/mmu:17869…
Ribosome biogenesis in eukaryotes	KEGG PATHWAY	mmu03008	32	81	0.00149237	0.0182293	ENSMUSG00000027787|ENSMUSG00000029430|ENSMUSG00000030138|ENSMUSG00000032834|ENSMUSG00000026020|ENSMUSG00000033285|ENSMUSG00000030521|ENSMUSG00000025337|ENSMUSG00000028869|ENSMUSG00000004268|ENSMUSG00000041438|ENSMUSG00000038299|ENSMUSG00000026127|ENSMUSG00000018040|ENSMUSG00000032288|ENSMUSG00000027722|ENSMUSG00000027613|ENSMUSG00000021149|ENSMUSG00000041057|ENSMUSG00000054079|ENSMUSG00000022325|…	mmu:97112|mmu:19384|mmu:213895|mmu:110816|mmu:55989|mmu:269470|mmu:67973|mmu:66711|mmu:230737|mmu:14791|mmu:21771|mmu:225348|mmu:27993|mmu:74778|mmu:102462|mmu:57815|mmu:16418|mmu:69237|mmu:72515|mmu:217109|mmu:67724|mmu:72554|mmu:68147|mmu:224092|mmu:59028|mmu:245474|mmu:30877|mmu:217995|mmu:52530|mmu:21453|mmu:216987|mmu:20826|	97112|19384|213895|110816|55989|269470|67973|66711|230737|14791|21771|225348|27993|74778|102462|57815|16418|69237|72515|217109|67724|72554|68147|224092|59028|245474|30877|217995|52530|21453|216987|20826|	http://www.genome.jp/kegg-bin/show_pathway?mmu03008/mmu:230737%09red/mmu:217109%09red/mmu:52530%09red/mmu:213895%09red/mmu:102462%09red/mmu:66711%09red/mmu:68147%09red/mmu:21771%09red/mmu:69237%09red/mmu:30877%09red/mmu:72515%09red/mmu:74778%09red/mmu:245474%09red/mmu:20826%09red/mmu:72554%09red/mmu:269470%09red/mmu:16418%09red/mmu:225348%09red/mmu:27993%09red/mmu:19384%09red/mmu:97112%09red/mmu:…
Pertussis	KEGG PATHWAY	mmu05133	30	74	0.00150204	0.0182293	ENSMUSG00000055172|ENSMUSG00000020826|ENSMUSG00000052684|ENSMUSG00000024927|ENSMUSG00000000555|ENSMUSG00000032508|ENSMUSG00000081308|ENSMUSG00000000001|ENSMUSG00000083750|ENSMUSG00000024401|ENSMUSG00000036905|ENSMUSG00000021250|ENSMUSG00000039005|ENSMUSG00000018899|ENSMUSG00000030786|ENSMUSG00000025809|ENSMUSG00000059883|ENSMUSG00000027399|ENSMUSG00000027398|ENSMUSG00000029371|ENSMUSG00000025888|…	mmu:50909|mmu:18126|mmu:16476|mmu:19697|mmu:16402|mmu:17874|mmu:12313|mmu:14679|mmu:12631|mmu:21926|mmu:12260|mmu:14281|mmu:21898|mmu:16362|mmu:16409|mmu:16412|mmu:266632|mmu:16175|mmu:16176|mmu:20311|mmu:12362|mmu:16414|mmu:12475|mmu:12268|mmu:18033|mmu:216799|mmu:26416|mmu:16193|mmu:15900|mmu:117149|	50909|18126|16476|19697|16402|17874|12313|14679|12631|21926|12260|14281|21898|16362|16409|16412|266632|16175|16176|20311|12362|16414|12475|12268|18033|216799|26416|16193|15900|117149|	http://www.genome.jp/kegg-bin/show_pathway?mmu05133/mmu:12313%09red/mmu:16409%09red/mmu:16402%09red/mmu:19697%09red/mmu:50909%09red/mmu:16193%09red/mmu:21926%09red/mmu:12631%09red/mmu:18033%09red/mmu:12475%09red/mmu:20311%09red/mmu:117149%09red/mmu:15900%09red/mmu:17874%09red/mmu:16476%09red/mmu:16412%09red/mmu:16414%09red/mmu:26416%09red/mmu:21898%09red/mmu:14679%09red/mmu:14281%09red/mmu:12362%…
Chagas disease (American trypanosomiasis)	KEGG PATHWAY	mmu05142	38	103	0.00157337	0.0182647	ENSMUSG00000020009|ENSMUSG00000000001|ENSMUSG00000020826|ENSMUSG00000052684|ENSMUSG00000024927|ENSMUSG00000026029|ENSMUSG00000032508|ENSMUSG00000022052|ENSMUSG00000021070|ENSMUSG00000004056|ENSMUSG00000032058|ENSMUSG00000032402|ENSMUSG00000035352|ENSMUSG00000024401|ENSMUSG00000036905|ENSMUSG00000039005|ENSMUSG00000059883|ENSMUSG00000021253|ENSMUSG00000021250|ENSMUSG00000051498|ENSMUSG00000039239|…	mmu:15979|mmu:14679|mmu:18126|mmu:16476|mmu:19697|mmu:12370|mmu:17874|mmu:52432|mmu:12062|mmu:11652|mmu:73699|mmu:17127|mmu:20293|mmu:21926|mmu:12260|mmu:21898|mmu:266632|mmu:21809|mmu:14281|mmu:21899|mmu:21808|mmu:21937|mmu:18035|mmu:11421|mmu:16176|mmu:21813|mmu:20304|mmu:20302|mmu:320207|mmu:18787|mmu:18033|mmu:20296|mmu:12633|mmu:26416|mmu:16193|mmu:18709|mmu:24088|mmu:14102|	15979|14679|18126|16476|19697|12370|17874|52432|12062|11652|73699|17127|20293|21926|12260|21898|266632|21809|14281|21899|21808|21937|18035|11421|16176|21813|20304|20302|320207|18787|18033|20296|12633|26416|16193|18709|24088|14102|	http://www.genome.jp/kegg-bin/show_pathway?mmu05142/mmu:73699%09red/mmu:18033%09red/mmu:18709%09red/mmu:21809%09red/mmu:12370%09red/mmu:19697%09red/mmu:12062%09red/mmu:16193%09red/mmu:21926%09red/mmu:15979%09red/mmu:26416%09red/mmu:12633%09red/mmu:320207%09red/mmu:18035%09red/mmu:18787%09red/mmu:18126%09red/mmu:17874%09red/mmu:14102%09red/mmu:20304%09red/mmu:16476%09red/mmu:14679%09red/mmu:20296%…
Hematopoietic cell lineage	KEGG PATHWAY	mmu04640	33	86	0.00186176	0.0207121	ENSMUSG00000038067|ENSMUSG00000039062|ENSMUSG00000005672|ENSMUSG00000000555|ENSMUSG00000030724|ENSMUSG00000042284|ENSMUSG00000015947|ENSMUSG00000014599|ENSMUSG00000019966|ENSMUSG00000024401|ENSMUSG00000027111|ENSMUSG00000005087|ENSMUSG00000027947|ENSMUSG00000030786|ENSMUSG00000030342|ENSMUSG00000101309|ENSMUSG00000030748|ENSMUSG00000029084|ENSMUSG00000002944|ENSMUSG00000016494|ENSMUSG00000027399|…	mmu:12985|mmu:16790|mmu:16590|mmu:16402|mmu:12478|mmu:109700|mmu:14129|mmu:12977|mmu:17311|mmu:21926|mmu:16403|mmu:12505|mmu:16194|mmu:16409|mmu:12527|mmu:16403|mmu:16190|mmu:12494|mmu:12491|mmu:12490|mmu:16175|mmu:16176|mmu:16398|mmu:16156|mmu:12475|mmu:12489|mmu:16399|mmu:12509|mmu:16193|mmu:12981|mmu:12986|mmu:16178|mmu:16177|	12985|16790|16590|16402|12478|109700|14129|12977|17311|21926|16403|12505|16194|16409|12527|16403|16190|12494|12491|12490|16175|16176|16398|16156|12475|12489|16399|12509|16193|12981|12986|16178|16177|	http://www.genome.jp/kegg-bin/show_pathway?mmu04640/mmu:12494%09red/mmu:17311%09red/mmu:12490%09red/mmu:12491%09red/mmu:16409%09red/mmu:16790%09red/mmu:16403%09red/mmu:16402%09red/mmu:16399%09red/mmu:16398%09red/mmu:16190%09red/mmu:16193%09red/mmu:21926%09red/mmu:16194%09red/mmu:12478%09red/mmu:109700%09red/mmu:16590%09red/mmu:12475%09red/mmu:12986%09red/mmu:12985%09red/mmu:12981%09red/mmu:12489%…
Jak-STAT signaling pathway	KEGG PATHWAY	mmu04630	51	155	0.00221751	0.023683	ENSMUSG00000038067|ENSMUSG00000020009|ENSMUSG00000034165|ENSMUSG00000021756|ENSMUSG00000020027|ENSMUSG00000027351|ENSMUSG00000058755|ENSMUSG00000040663|ENSMUSG00000016524|ENSMUSG00000031805|ENSMUSG00000031304|ENSMUSG00000034342|ENSMUSG00000022346|ENSMUSG00000004266|ENSMUSG00000024014|ENSMUSG00000031834|ENSMUSG00000004056|ENSMUSG00000024427|ENSMUSG00000070348|ENSMUSG00000053113|ENSMUSG00000054263|…	mmu:12985|mmu:15979|mmu:12445|mmu:16195|mmu:216233|mmu:114715|mmu:18413|mmu:56708|mmu:329244|mmu:16453|mmu:16186|mmu:12402|mmu:17869|mmu:15170|mmu:18712|mmu:18709|mmu:11652|mmu:24066|mmu:12443|mmu:12702|mmu:16880|mmu:20846|mmu:12983|mmu:24064|mmu:12983|mmu:16878|mmu:16194|mmu:16193|mmu:12981|mmu:24063|mmu:101809|mmu:208650|mmu:19247|mmu:12444|mmu:16190|mmu:12700|mmu:16156|mmu:320207|mmu:20850|mmu…	12985|15979|12445|16195|216233|114715|18413|56708|329244|16453|16186|12402|17869|15170|18712|18709|11652|24066|12443|12702|16880|20846|12983|24064|12983|16878|16194|16193|12981|24063|101809|208650|19247|12444|16190|12700|16156|320207|20850|20848|16452|16164|16391|12703|20847|18414|15975|12048|16155|12986|20852|	http://www.genome.jp/kegg-bin/show_pathway?mmu04630/mmu:12048%09red/mmu:16391%09red/mmu:208650%09red/mmu:15975%09red/mmu:18709%09red/mmu:16190%09red/mmu:16193%09red/mmu:16195%09red/mmu:16194%09red/mmu:15979%09red/mmu:16164%09red/mmu:19247%09red/mmu:320207%09red/mmu:15170%09red/mmu:101809%09red/mmu:24063%09red/mmu:20848%09red/mmu:329244%09red/mmu:216233%09red/mmu:20847%09red/mmu:16878%09red/mmu:16…
Complement and coagulation cascades	KEGG PATHWAY	mmu04610	30	77	0.00243297	0.0249756	ENSMUSG00000022912|ENSMUSG00000028128|ENSMUSG00000030111|ENSMUSG00000039109|ENSMUSG00000001930|ENSMUSG00000016481|ENSMUSG00000028001|ENSMUSG00000055172|ENSMUSG00000026579|ENSMUSG00000031444|ENSMUSG00000046223|ENSMUSG00000021070|ENSMUSG00000031538|ENSMUSG00000074743|ENSMUSG00000071178|ENSMUSG00000021822|ENSMUSG00000033831|ENSMUSG00000040552|ENSMUSG00000027082|ENSMUSG00000071177|ENSMUSG00000033860|…	mmu:19128|mmu:14066|mmu:232345|mmu:74145|mmu:22371|mmu:12946|mmu:14161|mmu:50909|mmu:14067|mmu:14058|mmu:18793|mmu:12062|mmu:18791|mmu:21824|mmu:20701|mmu:18792|mmu:110135|mmu:12267|mmu:21788|mmu:20703|mmu:99571|mmu:12628|mmu:12260|mmu:12061|mmu:18787|mmu:12268|mmu:12273|mmu:12628|mmu:12509|mmu:18816|	19128|14066|232345|74145|22371|12946|14161|50909|14067|14058|18793|12062|18791|21824|20701|18792|110135|12267|21788|20703|99571|12628|12260|12061|18787|12268|12273|12628|12509|18816|	http://www.genome.jp/kegg-bin/show_pathway?mmu04610/mmu:14058%09red/mmu:12273%09red/mmu:12061%09red/mmu:50909%09red/mmu:12062%09red/mmu:21824%09red/mmu:232345%09red/mmu:19128%09red/mmu:18816%09red/mmu:18787%09red/mmu:12946%09red/mmu:20703%09red/mmu:20701%09red/mmu:22371%09red/mmu:99571%09red/mmu:14067%09red/mmu:14066%09red/mmu:14161%09red/mmu:12267%09red/mmu:12260%09red/mmu:12509%09red/mmu:12268%…
HTLV-I infection	KEGG PATHWAY	mmu05166	81	277	0.00252563	0.0249756	ENSMUSG00000030170|ENSMUSG00000055723|ENSMUSG00000067235|ENSMUSG00000031834|ENSMUSG00000002111|ENSMUSG00000023067|ENSMUSG00000026436|ENSMUSG00000029430|ENSMUSG00000025856|ENSMUSG00000022895|ENSMUSG00000063889|ENSMUSG00000034165|ENSMUSG00000030527|ENSMUSG00000059552|ENSMUSG00000017652|ENSMUSG00000023027|ENSMUSG00000032035|ENSMUSG00000024912|ENSMUSG00000033016|ENSMUSG00000028645|ENSMUSG00000024927|…	mmu:22419|mmu:66922|mmu:101056305|mmu:18709|mmu:20375|mmu:12575|mmu:13714|mmu:19384|mmu:18590|mmu:23872|mmu:12916|mmu:12445|mmu:70461|mmu:22059|mmu:21939|mmu:11908|mmu:23871|mmu:14283|mmu:18018|mmu:20525|mmu:19697|mmu:15894|mmu:104110|mmu:17869|mmu:18591|mmu:21813|mmu:18596|mmu:12443|mmu:11652|mmu:18021|mmu:16453|mmu:13653|mmu:19698|mmu:14366|mmu:21926|mmu:14370|mmu:12444|mmu:18974|mmu:14972|mmu:…	22419|66922|101056305|18709|20375|12575|13714|19384|18590|23872|12916|12445|70461|22059|21939|11908|23871|14283|18018|20525|19697|15894|104110|17869|18591|21813|18596|12443|11652|18021|16453|13653|19698|14366|21926|14370|12444|18974|14972|17127|16476|18034|26406|16653|21809|14281|12048|21808|14964|17000|21937|18035|110557|14369|18176|21894|20525|18538|19057|11911|93735|16408|20130|16414|320207|20…	http://www.genome.jp/kegg-bin/show_pathway?mmu05166/mmu:16653%09red/mmu:18033%09red/mmu:23872%09red/mmu:14964%09red/mmu:12575%09red/mmu:16408%09red/mmu:13714%09red/mmu:18709%09red/mmu:18035%09red/mmu:21809%09red/mmu:18974%09red/mmu:12048%09red/mmu:19697%09red/mmu:20130%09red/mmu:14369%09red/mmu:70461%09red/mmu:16193%09red/mmu:19698%09red/mmu:21926%09red/mmu:66922%09red/mmu:20375%09red/mmu:19057%0…
Regulation of actin cytoskeleton	KEGG PATHWAY	mmu04810	66	217	0.00282005	0.0268912	ENSMUSG00000022836|ENSMUSG00000055723|ENSMUSG00000033220|ENSMUSG00000006304|ENSMUSG00000031165|ENSMUSG00000031207|ENSMUSG00000025856|ENSMUSG00000022781|ENSMUSG00000037225|ENSMUSG00000025372|ENSMUSG00000026193|ENSMUSG00000083750|ENSMUSG00000031565|ENSMUSG00000022443|ENSMUSG00000024290|ENSMUSG00000000555|ENSMUSG00000029621|ENSMUSG00000028126|ENSMUSG00000018293|ENSMUSG00000030789|ENSMUSG00000024620|…	mmu:107589|mmu:66922|mmu:19354|mmu:76709|mmu:22376|mmu:17698|mmu:18590|mmu:224105|mmu:14173|mmu:108100|mmu:14268|mmu:12631|mmu:14182|mmu:17886|mmu:19877|mmu:16402|mmu:56443|mmu:18720|mmu:18643|mmu:16411|mmu:18596|mmu:330662|mmu:109700|mmu:109711|mmu:56378|mmu:19241|mmu:381924|mmu:22330|mmu:14186|mmu:320910|mmu:14674|mmu:16403|mmu:67268|mmu:22350|mmu:60595|mmu:22324|mmu:544963|mmu:11867|mmu:16409|…	107589|66922|19354|76709|22376|17698|18590|224105|14173|108100|14268|12631|14182|17886|19877|16402|56443|18720|18643|16411|18596|330662|109700|109711|56378|19241|381924|22330|14186|320910|14674|16403|67268|22350|60595|22324|544963|11867|16409|16412|242687|18591|16403|11465|16410|67771|29875|18176|16398|16653|12475|54635|20130|105855|16408|12061|16414|320207|434782|98932|16399|12062|13367|18709|14…	http://www.genome.jp/kegg-bin/show_pathway?mmu04810/mmu:22350%09red/mmu:224105%09red/mmu:18176%09red/mmu:16409%09red/mmu:16408%09red/mmu:320910%09red/mmu:544963%09red/mmu:18709%09red/mmu:16403%09red/mmu:16402%09red/mmu:16399%09red/mmu:16398%09red/mmu:18643%09red/mmu:12061%09red/mmu:12062%09red/mmu:108100%09red/mmu:66922%09red/mmu:12631%09red/mmu:14186%09red/mmu:14674%09red/mmu:109700%09red/mmu:56…
Rheumatoid arthritis	KEGG PATHWAY	mmu05323	31	82	0.00300735	0.0276884	ENSMUSG00000021477|ENSMUSG00000052684|ENSMUSG00000037405|ENSMUSG00000061353|ENSMUSG00000043613|ENSMUSG00000029648|ENSMUSG00000022015|ENSMUSG00000021253|ENSMUSG00000035352|ENSMUSG00000024401|ENSMUSG00000075122|ENSMUSG00000039005|ENSMUSG00000028238|ENSMUSG00000022901|ENSMUSG00000015575|ENSMUSG00000021250|ENSMUSG00000039239|ENSMUSG00000027399|ENSMUSG00000027398|ENSMUSG00000029371|ENSMUSG00000035042|…	mmu:13039|mmu:16476|mmu:15894|mmu:20315|mmu:17392|mmu:14254|mmu:21943|mmu:21809|mmu:20293|mmu:21926|mmu:12519|mmu:21898|mmu:242341|mmu:12524|mmu:11974|mmu:14281|mmu:21808|mmu:16175|mmu:16176|mmu:20311|mmu:20304|mmu:20302|mmu:16408|mmu:16156|mmu:16414|mmu:12977|mmu:24088|mmu:20296|mmu:16193|mmu:12981|mmu:11433|	13039|16476|15894|20315|17392|14254|21943|21809|20293|21926|12519|21898|242341|12524|11974|14281|21808|16175|16176|20311|20304|20302|16408|16156|16414|12977|24088|20296|16193|12981|11433|	http://www.genome.jp/kegg-bin/show_pathway?mmu05323/mmu:11974%09red/mmu:16408%09red/mmu:13039%09red/mmu:21943%09red/mmu:21809%09red/mmu:21808%09red/mmu:12519%09red/mmu:16193%09red/mmu:242341%09red/mmu:21926%09red/mmu:11433%09red/mmu:20311%09red/mmu:20296%09red/mmu:20304%09red/mmu:16476%09red/mmu:16414%09red/mmu:12981%09red/mmu:20293%09red/mmu:21898%09red/mmu:20315%09red/mmu:12524%09red/mmu:14281%…
NOD-like receptor signaling pathway	KEGG PATHWAY	mmu04621	24	58	0.00344828	0.0306897	ENSMUSG00000103439|ENSMUSG00000029380|ENSMUSG00000024927|ENSMUSG00000084899|ENSMUSG00000026029|ENSMUSG00000055994|ENSMUSG00000021025|ENSMUSG00000024401|ENSMUSG00000021709|ENSMUSG00000058427|ENSMUSG00000035352|ENSMUSG00000022534|ENSMUSG00000027398|ENSMUSG00000035042|ENSMUSG00000025888|ENSMUSG00000078945|ENSMUSG00000057367|ENSMUSG00000028163|ENSMUSG00000032691|ENSMUSG00000035385|ENSMUSG00000032000|…	mmu:11796|mmu:14825|mmu:19697|mmu:22027|mmu:12370|mmu:257632|mmu:18035|mmu:21926|mmu:59079|mmu:20310|mmu:20293|mmu:54483|mmu:16176|mmu:20304|mmu:12362|mmu:17948|mmu:11797|mmu:18033|mmu:216799|mmu:20296|mmu:11796|mmu:26416|mmu:16193|mmu:21929|	11796|14825|19697|22027|12370|257632|18035|21926|59079|20310|20293|54483|16176|20304|12362|17948|11797|18033|216799|20296|11796|26416|16193|21929|	http://www.genome.jp/kegg-bin/show_pathway?mmu04621/mmu:12370%09red/mmu:21929%09red/mmu:19697%09red/mmu:16193%09red/mmu:21926%09red/mmu:54483%09red/mmu:26416%09red/mmu:18033%09red/mmu:18035%09red/mmu:20310%09red/mmu:59079%09red/mmu:20304%09red/mmu:14825%09red/mmu:20296%09red/mmu:20293%09red/mmu:22027%09red/mmu:12362%09red/mmu:11796%09red/mmu:11797%09red/mmu:216799%09red/mmu:17948%09red/mmu:257632…
Tuberculosis	KEGG PATHWAY	mmu05152	55	176	0.00379673	0.0327009	ENSMUSG00000020009|ENSMUSG00000056216|ENSMUSG00000059498|ENSMUSG00000026712|ENSMUSG00000059883|ENSMUSG00000026656|ENSMUSG00000038357|ENSMUSG00000021457|ENSMUSG00000026104|ENSMUSG00000016534|ENSMUSG00000020826|ENSMUSG00000058715|ENSMUSG00000024927|ENSMUSG00000030707|ENSMUSG00000026029|ENSMUSG00000032508|ENSMUSG00000079293|ENSMUSG00000055994|ENSMUSG00000081308|ENSMUSG00000024359|ENSMUSG00000004056|…	mmu:15979|mmu:12611|mmu:14131|mmu:17533|mmu:266632|mmu:14130|mmu:12796|mmu:20963|mmu:20846|mmu:16784|mmu:18126|mmu:14127|mmu:19697|mmu:12721|mmu:12370|mmu:17874|mmu:56644|mmu:257632|mmu:12313|mmu:15526|mmu:11652|mmu:14129|mmu:16803|mmu:246256|mmu:21926|mmu:108960|mmu:21898|mmu:242341|mmu:56619|mmu:16411|mmu:16409|mmu:21809|mmu:21899|mmu:21808|mmu:21937|mmu:16452|mmu:13040|mmu:16175|mmu:16176|mmu:…	15979|12611|14131|17533|266632|14130|12796|20963|20846|16784|18126|14127|19697|12721|12370|17874|56644|257632|12313|15526|11652|14129|16803|246256|21926|108960|21898|242341|56619|16411|16409|21809|21899|21808|21937|16452|13040|16175|16176|20698|19057|15510|16414|12475|16149|24088|21897|18033|26416|16193|16155|170786|16985|117149|12608|	http://www.genome.jp/kegg-bin/show_pathway?mmu05152/mmu:12313%09red/mmu:15526%09red/mmu:18033%09red/mmu:14131%09red/mmu:14130%09red/mmu:16409%09red/mmu:16411%09red/mmu:21809%09red/mmu:12370%09red/mmu:19697%09red/mmu:16193%09red/mmu:242341%09red/mmu:21926%09red/mmu:108960%09red/mmu:26416%09red/mmu:16985%09red/mmu:12611%09red/mmu:12475%09red/mmu:19057%09red/mmu:13040%09red/mmu:16149%09red/mmu:20846…
Chronic myeloid leukemia	KEGG PATHWAY	mmu05220	28	73	0.00395945	0.0327815	ENSMUSG00000023067|ENSMUSG00000027684|ENSMUSG00000059552|ENSMUSG00000024927|ENSMUSG00000022346|ENSMUSG00000032440|ENSMUSG00000004056|ENSMUSG00000070348|ENSMUSG00000032402|ENSMUSG00000022952|ENSMUSG00000021025|ENSMUSG00000042626|ENSMUSG00000040274|ENSMUSG00000009681|ENSMUSG00000030265|ENSMUSG00000021253|ENSMUSG00000031834|ENSMUSG00000039239|ENSMUSG00000020184|ENSMUSG00000022637|ENSMUSG00000043733|…	mmu:12575|mmu:14013|mmu:22059|mmu:19697|mmu:17869|mmu:21813|mmu:11652|mmu:12443|mmu:17127|mmu:12394|mmu:18035|mmu:20416|mmu:12571|mmu:110279|mmu:16653|mmu:21809|mmu:18709|mmu:21808|mmu:17246|mmu:208650|mmu:19247|mmu:18176|mmu:320207|mmu:20850|mmu:12402|mmu:18033|mmu:12048|mmu:271849|	12575|14013|22059|19697|17869|21813|11652|12443|17127|12394|18035|20416|12571|110279|16653|21809|18709|21808|17246|208650|19247|18176|320207|20850|12402|18033|12048|271849|	http://www.genome.jp/kegg-bin/show_pathway?mmu05220/mmu:16653%09red/mmu:12571%09red/mmu:320207%09red/mmu:14013%09red/mmu:12575%09red/mmu:18709%09red/mmu:21809%09red/mmu:21808%09red/mmu:208650%09red/mmu:12048%09red/mmu:19697%09red/mmu:21813%09red/mmu:12394%09red/mmu:110279%09red/mmu:19247%09red/mmu:18033%09red/mmu:18035%09red/mmu:17246%09red/mmu:18176%09red/mmu:12402%09red/mmu:20416%09red/mmu:1244…
Hepatitis B	KEGG PATHWAY	mmu05161	47	145	0.00405165	0.0327815	ENSMUSG00000040033|ENSMUSG00000028163|ENSMUSG00000017716|ENSMUSG00000059552|ENSMUSG00000025887|ENSMUSG00000028763|ENSMUSG00000033016|ENSMUSG00000052684|ENSMUSG00000024927|ENSMUSG00000026029|ENSMUSG00000032508|ENSMUSG00000022346|ENSMUSG00000027230|ENSMUSG00000004056|ENSMUSG00000031902|ENSMUSG00000070348|ENSMUSG00000038648|ENSMUSG00000026104|ENSMUSG00000021025|ENSMUSG00000022285|ENSMUSG00000039005|…	mmu:20847|mmu:18033|mmu:11799|mmu:22059|mmu:12364|mmu:15530|mmu:18018|mmu:16476|mmu:19697|mmu:12370|mmu:17874|mmu:17869|mmu:26427|mmu:11652|mmu:18021|mmu:12443|mmu:208647|mmu:20846|mmu:18035|mmu:22631|mmu:21898|mmu:12571|mmu:13655|mmu:16193|mmu:16653|mmu:21809|mmu:14281|mmu:18709|mmu:21808|mmu:21926|mmu:20852|mmu:71586|mmu:11911|mmu:18176|mmu:320207|mmu:20850|mmu:24088|mmu:73181|mmu:12575|mmu:230…	20847|18033|11799|22059|12364|15530|18018|16476|19697|12370|17874|17869|26427|11652|18021|12443|208647|20846|18035|22631|21898|12571|13655|16193|16653|21809|14281|18709|21808|21926|20852|71586|11911|18176|320207|20850|24088|73181|12575|230073|54123|18538|117149|15975|19229|20848|14102|	http://www.genome.jp/kegg-bin/show_pathway?mmu05161/mmu:16653%09red/mmu:12571%09red/mmu:320207%09red/mmu:208647%09red/mmu:12575%09red/mmu:12364%09red/mmu:21809%09red/mmu:12370%09red/mmu:15975%09red/mmu:19697%09red/mmu:18709%09red/mmu:16193%09red/mmu:71586%09red/mmu:21926%09red/mmu:22631%09red/mmu:18033%09red/mmu:18035%09red/mmu:73181%09red/mmu:13655%09red/mmu:20848%09red/mmu:20846%09red/mmu:20847…
Small cell lung cancer	KEGG PATHWAY	mmu05222	31	85	0.00461014	0.0362032	ENSMUSG00000103439|ENSMUSG00000032487|ENSMUSG00000028163|ENSMUSG00000020826|ENSMUSG00000026193|ENSMUSG00000059552|ENSMUSG00000059436|ENSMUSG00000024927|ENSMUSG00000026479|ENSMUSG00000026478|ENSMUSG00000022346|ENSMUSG00000004056|ENSMUSG00000070348|ENSMUSG00000015647|ENSMUSG00000021025|ENSMUSG00000019846|ENSMUSG00000027087|ENSMUSG00000040274|ENSMUSG00000025809|ENSMUSG00000031834|ENSMUSG00000101309|…	mmu:11796|mmu:19225|mmu:18033|mmu:18126|mmu:14268|mmu:22059|mmu:17187|mmu:19697|mmu:16782|mmu:226519|mmu:17869|mmu:11652|mmu:12443|mmu:16776|mmu:18035|mmu:16775|mmu:16410|mmu:12571|mmu:16412|mmu:18709|mmu:16403|mmu:16398|mmu:16777|mmu:320207|mmu:11797|mmu:12827|mmu:12826|mmu:16399|mmu:11796|mmu:16403|mmu:12048|	11796|19225|18033|18126|14268|22059|17187|19697|16782|226519|17869|11652|12443|16776|18035|16775|16410|12571|16412|18709|16403|16398|16777|320207|11797|12827|12826|16399|11796|16403|12048|	http://www.genome.jp/kegg-bin/show_pathway?mmu05222/mmu:12571%09red/mmu:320207%09red/mmu:16775%09red/mmu:16777%09red/mmu:16776%09red/mmu:16403%09red/mmu:16399%09red/mmu:16398%09red/mmu:17187%09red/mmu:12048%09red/mmu:19697%09red/mmu:18709%09red/mmu:14268%09red/mmu:18033%09red/mmu:18035%09red/mmu:12827%09red/mmu:19225%09red/mmu:16410%09red/mmu:226519%09red/mmu:16412%09red/mmu:12826%09red/mmu:16782…
RNA transport	KEGG PATHWAY	mmu03013	51	166	0.00672926	0.0477306	ENSMUSG00000027787|ENSMUSG00000032939|ENSMUSG00000069808|ENSMUSG00000030188|ENSMUSG00000091549|ENSMUSG00000029430|ENSMUSG00000051329|ENSMUSG00000021116|ENSMUSG00000005610|ENSMUSG00000056076|ENSMUSG00000057561|ENSMUSG00000063550|ENSMUSG00000028156|ENSMUSG00000037275|ENSMUSG00000045983|ENSMUSG00000101188|ENSMUSG00000027236|ENSMUSG00000022325|ENSMUSG00000003226|ENSMUSG00000052533|ENSMUSG00000021645|…	mmu:97112|mmu:71805|mmu:276919|mmu:66441|mmu:13627|mmu:19384|mmu:59015|mmu:13665|mmu:13690|mmu:27979|mmu:13664|mmu:269966|mmu:13684|mmu:216766|mmu:208643|mmu:13681|mmu:78655|mmu:67724|mmu:19386|mmu:227699|mmu:20595|mmu:16211|mmu:21681|mmu:18458|mmu:68626|mmu:18226|mmu:433702|mmu:20901|mmu:116940|mmu:53356|mmu:13685|mmu:108989|mmu:408191|mmu:218210|mmu:71844|mmu:18141|mmu:192170|mmu:55944|mmu:2691…	97112|71805|276919|66441|13627|19384|59015|13665|13690|27979|13664|269966|13684|216766|208643|13681|78655|67724|19386|227699|20595|16211|21681|18458|68626|18226|433702|20901|116940|53356|13685|108989|408191|218210|71844|18141|192170|55944|269113|67204|72124|230721|226982|20918|13682|13627|67204|16341|13669|217869|170930|	http://www.genome.jp/kegg-bin/show_pathway?mmu03013/mmu:13684%09red/mmu:13685%09red/mmu:13682%09red/mmu:13681%09red/mmu:226982%09red/mmu:269113%09red/mmu:53356%09red/mmu:13665%09red/mmu:192170%09red/mmu:217869%09red/mmu:20918%09red/mmu:16211%09red/mmu:72124%09red/mmu:276919%09red/mmu:16341%09red/mmu:55944%09red/mmu:59015%09red/mmu:27979%09red/mmu:227699%09red/mmu:116940%09red/mmu:67204%09red/mmu:…
B cell receptor signaling pathway	KEGG PATHWAY	mmu04662	27	73	0.00676015	0.0477306	ENSMUSG00000031264|ENSMUSG00000026656|ENSMUSG00000021457|ENSMUSG00000025017|ENSMUSG00000003379|ENSMUSG00000033016|ENSMUSG00000052684|ENSMUSG00000024927|ENSMUSG00000004266|ENSMUSG00000030724|ENSMUSG00000004056|ENSMUSG00000031902|ENSMUSG00000021025|ENSMUSG00000058818|ENSMUSG00000034116|ENSMUSG00000030265|ENSMUSG00000021250|ENSMUSG00000031834|ENSMUSG00000042228|ENSMUSG00000022092|ENSMUSG00000025491|…	mmu:12229|mmu:14130|mmu:20963|mmu:83490|mmu:12518|mmu:18018|mmu:16476|mmu:19697|mmu:15170|mmu:12478|mmu:11652|mmu:18021|mmu:18035|mmu:18733|mmu:22324|mmu:16653|mmu:14281|mmu:18709|mmu:17096|mmu:19057|mmu:68713|mmu:18176|mmu:320207|mmu:18033|mmu:12517|mmu:19354|mmu:234779|	12229|14130|20963|83490|12518|18018|16476|19697|15170|12478|11652|18021|18035|18733|22324|16653|14281|18709|17096|19057|68713|18176|320207|18033|12517|19354|234779|	http://www.genome.jp/kegg-bin/show_pathway?mmu04662/mmu:16653%09red/mmu:320207%09red/mmu:14130%09red/mmu:19697%09red/mmu:12517%09red/mmu:18709%09red/mmu:12518%09red/mmu:12478%09red/mmu:18033%09red/mmu:18035%09red/mmu:15170%09red/mmu:19057%09red/mmu:68713%09red/mmu:18018%09red/mmu:16476%09red/mmu:22324%09red/mmu:234779%09red/mmu:12229%09red/mmu:17096%09red/mmu:14281%09red/mmu:18733%09red/mmu:18176…
ECM-receptor interaction	KEGG PATHWAY	mmu04512	31	88	0.00687827	0.0477306	ENSMUSG00000028364|ENSMUSG00000001930|ENSMUSG00000029304|ENSMUSG00000029306|ENSMUSG00000026193|ENSMUSG00000028763|ENSMUSG00000000555|ENSMUSG00000026479|ENSMUSG00000026478|ENSMUSG00000042284|ENSMUSG00000015647|ENSMUSG00000023885|ENSMUSG00000019846|ENSMUSG00000020592|ENSMUSG00000021702|ENSMUSG00000027111|ENSMUSG00000017009|ENSMUSG00000005087|ENSMUSG00000025809|ENSMUSG00000101309|ENSMUSG00000004098|…	mmu:21923|mmu:22371|mmu:20750|mmu:15891|mmu:14268|mmu:15530|mmu:16402|mmu:16782|mmu:226519|mmu:109700|mmu:16776|mmu:21826|mmu:16775|mmu:20969|mmu:21828|mmu:16403|mmu:20971|mmu:12505|mmu:16412|mmu:16403|mmu:53867|mmu:16398|mmu:16777|mmu:320910|mmu:21825|mmu:12824|mmu:12827|mmu:12826|mmu:16399|mmu:16410|mmu:12491|	21923|22371|20750|15891|14268|15530|16402|16782|226519|109700|16776|21826|16775|20969|21828|16403|20971|12505|16412|16403|53867|16398|16777|320910|21825|12824|12827|12826|16399|16410|12491|	http://www.genome.jp/kegg-bin/show_pathway?mmu04512/mmu:16775%09red/mmu:12491%09red/mmu:16777%09red/mmu:16776%09red/mmu:320910%09red/mmu:22371%09red/mmu:16403%09red/mmu:16402%09red/mmu:16399%09red/mmu:16398%09red/mmu:21828%09red/mmu:21923%09red/mmu:21825%09red/mmu:20971%09red/mmu:14268%09red/mmu:109700%09red/mmu:12824%09red/mmu:12827%09red/mmu:12826%09red/mmu:16410%09red/mmu:16412%09red/mmu:16782…
HIF-1 signaling pathway	KEGG PATHWAY	mmu04066	37	111	0.00696533	0.0477306	ENSMUSG00000025877|ENSMUSG00000030339|ENSMUSG00000020009|ENSMUSG00000023067|ENSMUSG00000021367|ENSMUSG00000020826|ENSMUSG00000031465|ENSMUSG00000005533|ENSMUSG00000028645|ENSMUSG00000028156|ENSMUSG00000057534|ENSMUSG00000029648|ENSMUSG00000004056|ENSMUSG00000063229|ENSMUSG00000001131|ENSMUSG00000021109|ENSMUSG00000028978|ENSMUSG00000026773|ENSMUSG00000024927|ENSMUSG00000027947|ENSMUSG00000025746|…	mmu:212032|mmu:17000|mmu:15979|mmu:12575|mmu:13614|mmu:18126|mmu:11601|mmu:16001|mmu:20525|mmu:13684|mmu:67673|mmu:14254|mmu:11652|mmu:16828|mmu:21857|mmu:15251|mmu:18127|mmu:170768|mmu:19697|mmu:16194|mmu:16193|mmu:18709|mmu:13685|mmu:13058|mmu:270198|mmu:20525|mmu:22041|mmu:320207|mmu:15368|mmu:18787|mmu:18033|mmu:13866|mmu:15277|mmu:20104|mmu:234779|mmu:21898|mmu:20848|	212032|17000|15979|12575|13614|18126|11601|16001|20525|13684|67673|14254|11652|16828|21857|15251|18127|170768|19697|16194|16193|18709|13685|13058|270198|20525|22041|320207|15368|18787|18033|13866|15277|20104|234779|21898|20848|	http://www.genome.jp/kegg-bin/show_pathway?mmu04066/mmu:13685%09red/mmu:13684%09red/mmu:320207%09red/mmu:270198%09red/mmu:11601%09red/mmu:12575%09red/mmu:15368%09red/mmu:67673%09red/mmu:212032%09red/mmu:19697%09red/mmu:18709%09red/mmu:16193%09red/mmu:16194%09red/mmu:15979%09red/mmu:13866%09red/mmu:20525%09red/mmu:13614%09red/mmu:18033%09red/mmu:21898%09red/mmu:18787%09red/mmu:20848%09red/mmu:1812…
MAPK signaling pathway	KEGG PATHWAY	mmu04010	72	253	0.00710187	0.0477306	ENSMUSG00000055723|ENSMUSG00000036390|ENSMUSG00000032577|ENSMUSG00000021453|ENSMUSG00000025856|ENSMUSG00000031309|ENSMUSG00000037225|ENSMUSG00000016528|ENSMUSG00000002948|ENSMUSG00000059552|ENSMUSG00000026436|ENSMUSG00000052681|ENSMUSG00000031565|ENSMUSG00000033016|ENSMUSG00000059436|ENSMUSG00000024927|ENSMUSG00000022346|ENSMUSG00000028862|ENSMUSG00000090877|ENSMUSG00000000489|ENSMUSG00000032440|…	mmu:66922|mmu:13197|mmu:102626|mmu:23882|mmu:18590|mmu:110651|mmu:14173|mmu:17164|mmu:26400|mmu:22059|mmu:13714|mmu:215449|mmu:14182|mmu:18018|mmu:17187|mmu:19697|mmu:17869|mmu:53608|mmu:15511|mmu:18591|mmu:21813|mmu:18596|mmu:26410|mmu:19252|mmu:11652|mmu:18021|mmu:68794|mmu:67603|mmu:15370|mmu:15507|mmu:19698|mmu:12064|mmu:21926|mmu:16476|mmu:17873|mmu:26416|mmu:14013|mmu:18034|mmu:26406|mmu:16…	66922|13197|102626|23882|18590|110651|14173|17164|26400|22059|13714|215449|14182|18018|17187|19697|17869|53608|15511|18591|21813|18596|26410|19252|11652|18021|68794|67603|15370|15507|19698|12064|21926|16476|17873|26416|14013|18034|26406|16653|21809|14281|21808|21937|14186|16175|16176|16177|193740|15507|19057|224105|11911|18176|20130|19354|320139|192176|18033|19108|18049|13537|12475|114713|53859|5…	http://www.genome.jp/kegg-bin/show_pathway?mmu04010/mmu:224105%09red/mmu:18176%09red/mmu:215449%09red/mmu:14013%09red/mmu:16653%09red/mmu:13714%09red/mmu:14173%09red/mmu:320139%09red/mmu:21809%09red/mmu:12064%09red/mmu:17187%09red/mmu:17164%09red/mmu:19697%09red/mmu:192176%09red/mmu:21937%09red/mmu:102626%09red/mmu:19698%09red/mmu:21926%09red/mmu:13197%09red/mmu:16476%09red/mmu:26416%09red/mmu:14…
Amoebiasis	KEGG PATHWAY	mmu05146	39	119	0.00715065	0.0477306	ENSMUSG00000021125|ENSMUSG00000028163|ENSMUSG00000060147|ENSMUSG00000026193|ENSMUSG00000020826|ENSMUSG00000024927|ENSMUSG00000026479|ENSMUSG00000026478|ENSMUSG00000004951|ENSMUSG00000021823|ENSMUSG00000062345|ENSMUSG00000024401|ENSMUSG00000015143|ENSMUSG00000015647|ENSMUSG00000054808|ENSMUSG00000030786|ENSMUSG00000021253|ENSMUSG00000031834|ENSMUSG00000039239|ENSMUSG00000004098|ENSMUSG00000027398|…	mmu:11847|mmu:18033|mmu:20719|mmu:14268|mmu:18126|mmu:19697|mmu:16782|mmu:226519|mmu:15507|mmu:22330|mmu:18788|mmu:21926|mmu:109711|mmu:16776|mmu:60595|mmu:16409|mmu:21809|mmu:18709|mmu:21808|mmu:53867|mmu:16176|mmu:11846|mmu:16777|mmu:15507|mmu:16414|mmu:320207|mmu:12824|mmu:24088|mmu:12827|mmu:12826|mmu:19108|mmu:12475|mmu:16775|mmu:16193|mmu:12981|mmu:21898|mmu:16178|mmu:16177|mmu:20708|	11847|18033|20719|14268|18126|19697|16782|226519|15507|22330|18788|21926|109711|16776|60595|16409|21809|18709|21808|53867|16176|11846|16777|15507|16414|320207|12824|24088|12827|12826|19108|12475|16775|16193|12981|21898|16178|16177|20708|	http://www.genome.jp/kegg-bin/show_pathway?mmu05146/mmu:11846%09red/mmu:11847%09red/mmu:320207%09red/mmu:16775%09red/mmu:16409%09red/mmu:16776%09red/mmu:21809%09red/mmu:21808%09red/mmu:19697%09red/mmu:18709%09red/mmu:16193%09red/mmu:21926%09red/mmu:14268%09red/mmu:18033%09red/mmu:12475%09red/mmu:15507%09red/mmu:12824%09red/mmu:12827%09red/mmu:12826%09red/mmu:18126%09red/mmu:16777%09red/mmu:20708%…
Acute myeloid leukemia	KEGG PATHWAY	mmu05221	22	57	0.00935403	0.0609152	ENSMUSG00000002111|ENSMUSG00000037992|ENSMUSG00000066687|ENSMUSG00000036986|ENSMUSG00000005672|ENSMUSG00000024927|ENSMUSG00000002250|ENSMUSG00000022346|ENSMUSG00000024014|ENSMUSG00000027985|ENSMUSG00000004056|ENSMUSG00000070348|ENSMUSG00000022952|ENSMUSG00000034957|ENSMUSG00000030265|ENSMUSG00000031490|ENSMUSG00000027852|ENSMUSG00000020901|ENSMUSG00000004043|ENSMUSG00000004040|ENSMUSG00000028163|…	mmu:20375|mmu:19401|mmu:235320|mmu:18854|mmu:16590|mmu:19697|mmu:19015|mmu:17869|mmu:18712|mmu:16842|mmu:11652|mmu:12443|mmu:12394|mmu:12606|mmu:16653|mmu:13685|mmu:18176|mmu:320207|mmu:20850|mmu:20848|mmu:18033|mmu:18709|	20375|19401|235320|18854|16590|19697|19015|17869|18712|16842|11652|12443|12394|12606|16653|13685|18176|320207|20850|20848|18033|18709|	http://www.genome.jp/kegg-bin/show_pathway?mmu05221/mmu:16653%09red/mmu:13685%09red/mmu:18854%09red/mmu:19697%09red/mmu:18709%09red/mmu:320207%09red/mmu:12394%09red/mmu:20375%09red/mmu:235320%09red/mmu:18033%09red/mmu:16590%09red/mmu:20848%09red/mmu:19401%09red/mmu:19015%09red/mmu:18176%09red/mmu:18712%09red/mmu:12443%09red/mmu:12606%09red/mmu:17869%09red/mmu:16842%09red/mmu:20850%09red/mmu:11652…
Chemokine signaling pathway	KEGG PATHWAY	mmu04062	57	196	0.0108241	0.068321	ENSMUSG00000048960|ENSMUSG00000024290|ENSMUSG00000041112|ENSMUSG00000031165|ENSMUSG00000029380|ENSMUSG00000028874|ENSMUSG00000019122|ENSMUSG00000052681|ENSMUSG00000031805|ENSMUSG00000031779|ENSMUSG00000024927|ENSMUSG00000021948|ENSMUSG00000061353|ENSMUSG00000029371|ENSMUSG00000000001|ENSMUSG00000004056|ENSMUSG00000018927|ENSMUSG00000035385|ENSMUSG00000026104|ENSMUSG00000035352|ENSMUSG00000003228|…	mmu:277360|mmu:19877|mmu:140580|mmu:22376|mmu:14825|mmu:14191|mmu:20308|mmu:215449|mmu:16453|mmu:20299|mmu:19697|mmu:18753|mmu:20315|mmu:20311|mmu:14679|mmu:11652|mmu:20305|mmu:20296|mmu:20846|mmu:20293|mmu:14773|mmu:20292|mmu:20416|mmu:20306|mmu:22324|mmu:12768|mmu:16653|mmu:12772|mmu:104110|mmu:20310|mmu:18035|mmu:15162|mmu:330122|mmu:15945|mmu:14701|mmu:12765|mmu:17096|mmu:56744|mmu:57349|mmu:…	277360|19877|140580|22376|14825|14191|20308|215449|16453|20299|19697|18753|20315|20311|14679|11652|20305|20296|20846|20293|14773|20292|20416|20306|22324|12768|16653|12772|104110|20310|18035|15162|330122|15945|14701|12765|17096|56744|57349|20304|20302|12145|18176|320207|19229|20848|18033|16452|19108|19878|19354|20847|17969|18709|20303|12774|271849|	http://www.genome.jp/kegg-bin/show_pathway?mmu04062/mmu:16653%09red/mmu:18033%09red/mmu:215449%09red/mmu:57349%09red/mmu:22376%09red/mmu:18176%09red/mmu:19697%09red/mmu:12768%09red/mmu:18709%09red/mmu:12145%09red/mmu:12774%09red/mmu:140580%09red/mmu:20299%09red/mmu:12772%09red/mmu:104110%09red/mmu:320207%09red/mmu:18035%09red/mmu:20310%09red/mmu:20311%09red/mmu:19877%09red/mmu:20848%09red/mmu:203…
Fc gamma R-mediated phagocytosis	KEGG PATHWAY	mmu04666	30	88	0.0110585	0.068321	ENSMUSG00000006304|ENSMUSG00000031165|ENSMUSG00000026656|ENSMUSG00000047945|ENSMUSG00000021457|ENSMUSG00000004056|ENSMUSG00000030403|ENSMUSG00000029622|ENSMUSG00000021948|ENSMUSG00000033335|ENSMUSG00000052632|ENSMUSG00000083750|ENSMUSG00000015947|ENSMUSG00000026395|ENSMUSG00000034116|ENSMUSG00000029465|ENSMUSG00000031834|ENSMUSG00000029621|ENSMUSG00000044147|ENSMUSG00000003283|ENSMUSG00000008475|…	mmu:76709|mmu:22376|mmu:14130|mmu:17357|mmu:20963|mmu:11652|mmu:22323|mmu:11867|mmu:18753|mmu:13430|mmu:211914|mmu:12631|mmu:14129|mmu:19264|mmu:22324|mmu:56378|mmu:18709|mmu:56443|mmu:11845|mmu:15162|mmu:67771|mmu:242687|mmu:17096|mmu:20698|mmu:18720|mmu:320207|mmu:434782|mmu:19354|mmu:17969|mmu:234779|	76709|22376|14130|17357|20963|11652|22323|11867|18753|13430|211914|12631|14129|19264|22324|56378|18709|56443|11845|15162|67771|242687|17096|20698|18720|320207|434782|19354|17969|234779|	http://www.genome.jp/kegg-bin/show_pathway?mmu04666/mmu:11845%09red/mmu:14130%09red/mmu:22376%09red/mmu:18720%09red/mmu:18709%09red/mmu:12631%09red/mmu:20698%09red/mmu:19264%09red/mmu:320207%09red/mmu:22324%09red/mmu:13430%09red/mmu:22323%09red/mmu:234779%09red/mmu:17096%09red/mmu:434782%09red/mmu:11652%09red/mmu:20963%09red/mmu:14129%09red/mmu:18753%09red/mmu:17357%09red/mmu:242687%09red/mmu:193…
Staphylococcus aureus infection	KEGG PATHWAY	mmu05150	20	51	0.0112589	0.068321	ENSMUSG00000037405|ENSMUSG00000052270|ENSMUSG00000059498|ENSMUSG00000030830|ENSMUSG00000033860|ENSMUSG00000045551|ENSMUSG00000000290|ENSMUSG00000030786|ENSMUSG00000026656|ENSMUSG00000073418|ENSMUSG00000015947|ENSMUSG00000026580|ENSMUSG00000049130|ENSMUSG00000026365|ENSMUSG00000055172|ENSMUSG00000059089|ENSMUSG00000090081|ENSMUSG00000036905|ENSMUSG00000040552|ENSMUSG00000089991	mmu:15894|mmu:14289|mmu:14131|mmu:16408|mmu:99571|mmu:14293|mmu:16414|mmu:16409|mmu:14130|mmu:12268|mmu:14129|mmu:20344|mmu:12273|mmu:12628|mmu:50909|mmu:246256|mmu:20344|mmu:12260|mmu:12267|mmu:12628|	15894|14289|14131|16408|99571|14293|16414|16409|14130|12268|14129|20344|12273|12628|50909|246256|20344|12260|12267|12628|	http://www.genome.jp/kegg-bin/show_pathway?mmu05150/mmu:12267%09red/mmu:14131%09red/mmu:14293%09red/mmu:16414%09red/mmu:14130%09red/mmu:16409%09red/mmu:12628%09red/mmu:20344%09red/mmu:99571%09red/mmu:16408%09red/mmu:12273%09red/mmu:246256%09red/mmu:14129%09red/mmu:14289%09red/mmu:50909%09red/mmu:12260%09red/mmu:15894%09red/mmu:12268%09red
Inflammatory bowel disease (IBD)	KEGG PATHWAY	mmu05321	22	59	0.0126506	0.07506	ENSMUSG00000020009|ENSMUSG00000031304|ENSMUSG00000052684|ENSMUSG00000024927|ENSMUSG00000055994|ENSMUSG00000033016|ENSMUSG00000026068|ENSMUSG00000032402|ENSMUSG00000026104|ENSMUSG00000024401|ENSMUSG00000039005|ENSMUSG00000021253|ENSMUSG00000039239|ENSMUSG00000030748|ENSMUSG00000027399|ENSMUSG00000027398|ENSMUSG00000004040|ENSMUSG00000028163|ENSMUSG00000025746|ENSMUSG00000027995|ENSMUSG00000002147|…	mmu:15979|mmu:16186|mmu:16476|mmu:19697|mmu:257632|mmu:18018|mmu:16174|mmu:17127|mmu:20846|mmu:21926|mmu:21898|mmu:21809|mmu:21808|mmu:16190|mmu:16175|mmu:16176|mmu:20848|mmu:18033|mmu:16193|mmu:24088|mmu:20852|mmu:16182|	15979|16186|16476|19697|257632|18018|16174|17127|20846|21926|21898|21809|21808|16190|16175|16176|20848|18033|16193|24088|20852|16182|	http://www.genome.jp/kegg-bin/show_pathway?mmu05321/mmu:21809%09red/mmu:21808%09red/mmu:19697%09red/mmu:16190%09red/mmu:16193%09red/mmu:21926%09red/mmu:15979%09red/mmu:18033%09red/mmu:20848%09red/mmu:20846%09red/mmu:18018%09red/mmu:16476%09red/mmu:21898%09red/mmu:24088%09red/mmu:16182%09red/mmu:16186%09red/mmu:257632%09red/mmu:17127%09red/mmu:16176%09red/mmu:16175%09red/mmu:16174%09red/mmu:20852%…
Hippo signaling pathway	KEGG PATHWAY	mmu04390	46	154	0.0142304	0.0825983	ENSMUSG00000030170|ENSMUSG00000034165|ENSMUSG00000030353|ENSMUSG00000031681|ENSMUSG00000019997|ENSMUSG00000010067|ENSMUSG00000009073|ENSMUSG00000032058|ENSMUSG00000022178|ENSMUSG00000022346|ENSMUSG00000022052|ENSMUSG00000027985|ENSMUSG00000053110|ENSMUSG00000070348|ENSMUSG00000032402|ENSMUSG00000042745|ENSMUSG00000021253|ENSMUSG00000049791|ENSMUSG00000022285|ENSMUSG00000036904|ENSMUSG00000000184|…	mmu:22419|mmu:12445|mmu:21679|mmu:17125|mmu:14219|mmu:56289|mmu:18016|mmu:73699|mmu:16475|mmu:17869|mmu:52432|mmu:16842|mmu:22601|mmu:12443|mmu:17127|mmu:15901|mmu:21809|mmu:14366|mmu:22631|mmu:14370|mmu:12444|mmu:12156|mmu:232157|mmu:64010|mmu:319710|mmu:12385|mmu:21808|mmu:103583|mmu:11465|mmu:11839|mmu:14369|mmu:97064|mmu:21813|mmu:29806|mmu:50523|mmu:12550|mmu:21676|mmu:16414|mmu:11797|mmu:93…	22419|12445|21679|17125|14219|56289|18016|73699|16475|17869|52432|16842|22601|12443|17127|15901|21809|14366|22631|14370|12444|12156|232157|64010|319710|12385|21808|103583|11465|11839|14369|97064|21813|29806|50523|12550|21676|16414|11797|93735|18787|21678|11799|56274|15902|101543|	http://www.genome.jp/kegg-bin/show_pathway?mmu04390/mmu:73699%09red/mmu:21679%09red/mmu:12550%09red/mmu:21809%09red/mmu:21808%09red/mmu:319710%09red/mmu:232157%09red/mmu:56289%09red/mmu:21678%09red/mmu:21813%09red/mmu:21676%09red/mmu:103583%09red/mmu:97064%09red/mmu:14369%09red/mmu:22631%09red/mmu:29806%09red/mmu:14366%09red/mmu:93735%09red/mmu:18787%09red/mmu:18016%09red/mmu:56274%09red/mmu:6401…
Herpes simplex infection	KEGG PATHWAY	mmu05168	58	205	0.01574	0.0894165	ENSMUSG00000020009|ENSMUSG00000032661|ENSMUSG00000067235|ENSMUSG00000066861|ENSMUSG00000071172|ENSMUSG00000024079|ENSMUSG00000055762|ENSMUSG00000036986|ENSMUSG00000042333|ENSMUSG00000059552|ENSMUSG00000005824|ENSMUSG00000018446|ENSMUSG00000025134|ENSMUSG00000024927|ENSMUSG00000026029|ENSMUSG00000032508|ENSMUSG00000024097|ENSMUSG00000053113|ENSMUSG00000026222|ENSMUSG00000035385|ENSMUSG00000026104|…	mmu:15979|mmu:246727|mmu:101056305|mmu:23960|mmu:20383|mmu:19106|mmu:66656|mmu:18854|mmu:230979|mmu:22059|mmu:50930|mmu:12261|mmu:21681|mmu:19697|mmu:12370|mmu:17874|mmu:225027|mmu:12702|mmu:20684|mmu:20296|mmu:20846|mmu:20293|mmu:21926|mmu:20382|mmu:231805|mmu:18626|mmu:14972|mmu:16193|mmu:15312|mmu:14281|mmu:16476|mmu:21937|mmu:18035|mmu:16452|mmu:110557|mmu:246730|mmu:16176|mmu:23961|mmu:19247…	15979|246727|101056305|23960|20383|19106|66656|18854|230979|22059|50930|12261|21681|19697|12370|17874|225027|12702|20684|20296|20846|20293|21926|20382|231805|18626|14972|16193|15312|14281|16476|21937|18035|16452|110557|246730|16176|23961|19247|71586|20304|21354|14964|20383|80509|15957|54123|16149|24088|18033|230073|246728|16391|20847|15018|15975|13665|14102|	http://www.genome.jp/kegg-bin/show_pathway?mmu05168/mmu:23960%09red/mmu:231805%09red/mmu:24088%09red/mmu:16391%09red/mmu:230979%09red/mmu:20383%09red/mmu:20382%09red/mmu:20684%09red/mmu:12370%09red/mmu:18854%09red/mmu:14972%09red/mmu:19697%09red/mmu:246727%09red/mmu:246728%09red/mmu:16193%09red/mmu:71586%09red/mmu:21926%09red/mmu:15979%09red/mmu:19247%09red/mmu:15018%09red/mmu:66656%09red/mmu:180…
Hepatitis C	KEGG PATHWAY	mmu05160	41	136	0.017609	0.09795	ENSMUSG00000032661|ENSMUSG00000066861|ENSMUSG00000023067|ENSMUSG00000024079|ENSMUSG00000002325|ENSMUSG00000059552|ENSMUSG00000024927|ENSMUSG00000041378|ENSMUSG00000066058|ENSMUSG00000022052|ENSMUSG00000004056|ENSMUSG00000032058|ENSMUSG00000022336|ENSMUSG00000037936|ENSMUSG00000053113|ENSMUSG00000026104|ENSMUSG00000021025|ENSMUSG00000024401|ENSMUSG00000078652|ENSMUSG00000018899|ENSMUSG00000030265|…	mmu:246727|mmu:23960|mmu:12575|mmu:19106|mmu:16391|mmu:22059|mmu:19697|mmu:12741|mmu:242653|mmu:52432|mmu:11652|mmu:73699|mmu:16341|mmu:20778|mmu:12702|mmu:20846|mmu:18035|mmu:21926|mmu:19192|mmu:16362|mmu:16653|mmu:19766|mmu:21937|mmu:56173|mmu:246730|mmu:23961|mmu:18176|mmu:15957|mmu:320207|mmu:20848|mmu:18033|mmu:230073|mmu:246728|mmu:54123|mmu:20847|mmu:26416|mmu:15975|mmu:18709|mmu:13665|mmu…	246727|23960|12575|19106|16391|22059|19697|12741|242653|52432|11652|73699|16341|20778|12702|20846|18035|21926|19192|16362|16653|19766|21937|56173|246730|23961|18176|15957|320207|20848|18033|230073|246728|54123|20847|26416|15975|18709|13665|18260|60363|	http://www.genome.jp/kegg-bin/show_pathway?mmu05160/mmu:16653%09red/mmu:73699%09red/mmu:320207%09red/mmu:12575%09red/mmu:15957%09red/mmu:15975%09red/mmu:19697%09red/mmu:246727%09red/mmu:246728%09red/mmu:21926%09red/mmu:26416%09red/mmu:16391%09red/mmu:18260%09red/mmu:18033%09red/mmu:18035%09red/mmu:18709%09red/mmu:20848%09red/mmu:20846%09red/mmu:20847%09red/mmu:23960%09red/mmu:23961%09red/mmu:2300…
Adherens junction	KEGG PATHWAY	mmu04520	25	74	0.020733	0.112974	ENSMUSG00000009376|ENSMUSG00000027540|ENSMUSG00000025372|ENSMUSG00000031565|ENSMUSG00000005533|ENSMUSG00000028868|ENSMUSG00000004266|ENSMUSG00000032440|ENSMUSG00000027985|ENSMUSG00000030516|ENSMUSG00000031165|ENSMUSG00000032402|ENSMUSG00000021823|ENSMUSG00000020154|ENSMUSG00000034101|ENSMUSG00000015143|ENSMUSG00000054808|ENSMUSG00000042821|ENSMUSG00000037815|ENSMUSG00000062825|ENSMUSG00000030536|…	mmu:17295|mmu:19246|mmu:108100|mmu:14182|mmu:16001|mmu:242687|mmu:15170|mmu:21813|mmu:16842|mmu:21872|mmu:22376|mmu:17127|mmu:22330|mmu:19263|mmu:12388|mmu:109711|mmu:60595|mmu:20613|mmu:12385|mmu:11465|mmu:29875|mmu:20411|mmu:12550|mmu:19354|mmu:13866|	17295|19246|108100|14182|16001|242687|15170|21813|16842|21872|22376|17127|22330|19263|12388|109711|60595|20613|12385|11465|29875|20411|12550|19354|13866|	http://www.genome.jp/kegg-bin/show_pathway?mmu04520/mmu:22330%09red/mmu:22376%09red/mmu:12550%09red/mmu:12385%09red/mmu:108100%09red/mmu:13866%09red/mmu:19246%09red/mmu:14182%09red/mmu:29875%09red/mmu:19263%09red/mmu:15170%09red/mmu:16001%09red/mmu:21872%09red/mmu:12388%09red/mmu:11465%09red/mmu:21813%09red/mmu:20411%09red/mmu:242687%09red/mmu:109711%09red/mmu:20613%09red/mmu:19354%09red/mmu:1729…
Rap1 signaling pathway	KEGG PATHWAY	mmu04015	59	214	0.0221824	0.118454	ENSMUSG00000009376|ENSMUSG00000033220|ENSMUSG00000025856|ENSMUSG00000027954|ENSMUSG00000037225|ENSMUSG00000028864|ENSMUSG00000002699|ENSMUSG00000031465|ENSMUSG00000052681|ENSMUSG00000031565|ENSMUSG00000030403|ENSMUSG00000026821|ENSMUSG00000040152|ENSMUSG00000022220|ENSMUSG00000018293|ENSMUSG00000081308|ENSMUSG00000000001|ENSMUSG00000024620|ENSMUSG00000029648|ENSMUSG00000006445|ENSMUSG00000004056|…	mmu:17295|mmu:19354|mmu:18590|mmu:13636|mmu:14173|mmu:15234|mmu:16822|mmu:11601|mmu:215449|mmu:14182|mmu:22323|mmu:19730|mmu:21825|mmu:104110|mmu:18643|mmu:12313|mmu:14679|mmu:18596|mmu:14254|mmu:13836|mmu:11652|mmu:16653|mmu:16590|mmu:12977|mmu:16001|mmu:15901|mmu:14186|mmu:12388|mmu:17311|mmu:16409|mmu:16412|mmu:14257|mmu:11465|mmu:18654|mmu:18176|mmu:18760|mmu:21894|mmu:64143|mmu:16542|mmu:546…	17295|19354|18590|13636|14173|15234|16822|11601|215449|14182|22323|19730|21825|104110|18643|12313|14679|18596|14254|13836|11652|16653|16590|12977|16001|15901|14186|12388|17311|16409|16412|14257|11465|18654|18176|18760|21894|64143|16542|54635|12550|23880|16408|20130|14293|16414|320207|223864|244668|54519|18049|16399|106952|26416|18709|26397|18591|65086|74055|	http://www.genome.jp/kegg-bin/show_pathway?mmu04015/mmu:12313%09red/mmu:17311%09red/mmu:14293%09red/mmu:215449%09red/mmu:11601%09red/mmu:16409%09red/mmu:16408%09red/mmu:16542%09red/mmu:14173%09red/mmu:12550%09red/mmu:16399%09red/mmu:18643%09red/mmu:18709%09red/mmu:18760%09red/mmu:21825%09red/mmu:16822%09red/mmu:64143%09red/mmu:26416%09red/mmu:14186%09red/mmu:106952%09red/mmu:22323%09red/mmu:14182…
Prolactin signaling pathway	KEGG PATHWAY	mmu04917	24	74	0.0325955	0.169698	ENSMUSG00000020027|ENSMUSG00000056153|ENSMUSG00000024927|ENSMUSG00000004056|ENSMUSG00000022015|ENSMUSG00000070348|ENSMUSG00000053113|ENSMUSG00000026104|ENSMUSG00000042626|ENSMUSG00000018899|ENSMUSG00000030265|ENSMUSG00000021250|ENSMUSG00000024789|ENSMUSG00000000184|ENSMUSG00000032578|ENSMUSG00000027852|ENSMUSG00000020901|ENSMUSG00000004043|ENSMUSG00000004040|ENSMUSG00000028163|ENSMUSG00000038037|…	mmu:216233|mmu:54607|mmu:19697|mmu:11652|mmu:21943|mmu:12443|mmu:12702|mmu:20846|mmu:20416|mmu:16362|mmu:16653|mmu:14281|mmu:16452|mmu:12444|mmu:12700|mmu:18176|mmu:320207|mmu:20850|mmu:20848|mmu:18033|mmu:12703|mmu:26416|mmu:18709|mmu:271849|	216233|54607|19697|11652|21943|12443|12702|20846|20416|16362|16653|14281|16452|12444|12700|18176|320207|20850|20848|18033|12703|26416|18709|271849|	http://www.genome.jp/kegg-bin/show_pathway?mmu04917/mmu:16653%09red/mmu:320207%09red/mmu:21943%09red/mmu:19697%09red/mmu:18709%09red/mmu:54607%09red/mmu:26416%09red/mmu:18033%09red/mmu:20848%09red/mmu:20846%09red/mmu:16452%09red/mmu:14281%09red/mmu:216233%09red/mmu:16362%09red/mmu:18176%09red/mmu:20416%09red/mmu:12700%09red/mmu:12702%09red/mmu:12703%09red/mmu:12444%09red/mmu:12443%09red/mmu:27184…
Thyroid cancer	KEGG PATHWAY	mmu05216	12	29	0.0330499	0.169698	ENSMUSG00000000303|ENSMUSG00000027852|ENSMUSG00000022346|ENSMUSG00000030265|ENSMUSG00000006005|ENSMUSG00000027985|ENSMUSG00000059552|ENSMUSG00000070348|ENSMUSG00000058126|ENSMUSG00000048701|ENSMUSG00000027940|ENSMUSG00000085057	mmu:12550|mmu:18176|mmu:17869|mmu:16653|mmu:108989|mmu:16842|mmu:22059|mmu:12443|mmu:59069|mmu:76551|mmu:59069|mmu:18510|	12550|18176|17869|16653|108989|16842|22059|12443|59069|76551|59069|18510|	http://www.genome.jp/kegg-bin/show_pathway?mmu05216/mmu:59069%09red/mmu:108989%09red/mmu:18510%09red/mmu:16653%09red/mmu:18176%09red/mmu:12443%09red/mmu:76551%09red/mmu:12550%09red/mmu:22059%09red/mmu:17869%09red/mmu:16842%09red
Epstein-Barr virus infection	KEGG PATHWAY	mmu05169	57	212	0.0343944	0.17327	ENSMUSG00000029430|ENSMUSG00000067235|ENSMUSG00000048120|ENSMUSG00000002111|ENSMUSG00000023067|ENSMUSG00000024079|ENSMUSG00000021457|ENSMUSG00000031585|ENSMUSG00000059552|ENSMUSG00000017652|ENSMUSG00000031805|ENSMUSG00000052684|ENSMUSG00000024927|ENSMUSG00000037405|ENSMUSG00000055216|ENSMUSG00000022346|ENSMUSG00000090877|ENSMUSG00000001021|ENSMUSG00000030724|ENSMUSG00000004056|ENSMUSG00000038489|…	mmu:19384|mmu:101056305|mmu:12495|mmu:20375|mmu:12575|mmu:19106|mmu:20963|mmu:68153|mmu:22059|mmu:21939|mmu:16453|mmu:16476|mmu:19697|mmu:15894|mmu:17999|mmu:17869|mmu:15511|mmu:17999|mmu:12478|mmu:11652|mmu:66491|mmu:15507|mmu:19698|mmu:14191|mmu:18035|mmu:22631|mmu:67065|mmu:14972|mmu:12505|mmu:18034|mmu:22352|mmu:245841|mmu:19766|mmu:17246|mmu:17096|mmu:12494|mmu:110557|mmu:26400|mmu:69077|mmu…	19384|101056305|12495|20375|12575|19106|20963|68153|22059|21939|16453|16476|19697|15894|17999|17869|15511|17999|12478|11652|66491|15507|19698|14191|18035|22631|67065|14972|12505|18034|22352|245841|19766|17246|17096|12494|110557|26400|69077|193740|15507|14964|16408|19664|320207|20848|18033|230073|19108|53859|26416|234779|16155|26397|18709|15018|21929|	http://www.genome.jp/kegg-bin/show_pathway?mmu05169/mmu:67065%09red/mmu:12495%09red/mmu:22352%09red/mmu:320207%09red/mmu:19766%09red/mmu:12575%09red/mmu:16408%09red/mmu:18709%09red/mmu:66491%09red/mmu:21929%09red/mmu:19697%09red/mmu:17999%09red/mmu:19698%09red/mmu:19106%09red/mmu:110557%09red/mmu:20375%09red/mmu:12478%09red/mmu:12494%09red/mmu:15018%09red/mmu:22631%09red/mmu:18033%09red/mmu:18034…
Cytosolic DNA-sensing pathway	KEGG PATHWAY	mmu04623	21	63	0.0354751	0.173324	ENSMUSG00000024927|ENSMUSG00000035042|ENSMUSG00000024349|ENSMUSG00000022221|ENSMUSG00000027514|ENSMUSG00000032344|ENSMUSG00000026535|ENSMUSG00000028163|ENSMUSG00000040296|ENSMUSG00000021018|ENSMUSG00000025498|ENSMUSG00000021408|ENSMUSG00000025888|ENSMUSG00000038489|ENSMUSG00000025746|ENSMUSG00000034855|ENSMUSG00000021025|ENSMUSG00000027398|ENSMUSG00000000776|ENSMUSG00000024810|ENSMUSG00000018930	mmu:19697|mmu:20304|mmu:72512|mmu:56532|mmu:58203|mmu:214763|mmu:26388|mmu:18033|mmu:230073|mmu:245841|mmu:54123|mmu:19766|mmu:12362|mmu:66491|mmu:16193|mmu:15945|mmu:18035|mmu:16176|mmu:67065|mmu:77125|mmu:20303|	19697|20304|72512|56532|58203|214763|26388|18033|230073|245841|54123|19766|12362|66491|16193|15945|18035|16176|67065|77125|20303|	http://www.genome.jp/kegg-bin/show_pathway?mmu04623/mmu:67065%09red/mmu:230073%09red/mmu:214763%09red/mmu:245841%09red/mmu:54123%09red/mmu:20303%09red/mmu:18033%09red/mmu:18035%09red/mmu:15945%09red/mmu:12362%09red/mmu:72512%09red/mmu:66491%09red/mmu:77125%09red/mmu:19697%09red/mmu:16176%09red/mmu:19766%09red/mmu:58203%09red/mmu:16193%09red/mmu:26388%09red/mmu:56532%09red/mmu:20304%09red
Phagosome	KEGG PATHWAY	mmu04145	48	174	0.0357034	0.173324	ENSMUSG00000021477|ENSMUSG00000067235|ENSMUSG00000026712|ENSMUSG00000026656|ENSMUSG00000037321|ENSMUSG00000028238|ENSMUSG00000055172|ENSMUSG00000016534|ENSMUSG00000006519|ENSMUSG00000059498|ENSMUSG00000030707|ENSMUSG00000025044|ENSMUSG00000079293|ENSMUSG00000016255|ENSMUSG00000015947|ENSMUSG00000037936|ENSMUSG00000059089|ENSMUSG00000023885|ENSMUSG00000038642|ENSMUSG00000021702|ENSMUSG00000027087|…	mmu:13039|mmu:101056305|mmu:17533|mmu:14130|mmu:21354|mmu:242341|mmu:50909|mmu:16784|mmu:13057|mmu:14131|mmu:12721|mmu:20288|mmu:56644|mmu:545486|mmu:14129|mmu:20778|mmu:246256|mmu:21826|mmu:13040|mmu:21828|mmu:16410|mmu:17972|mmu:108078|mmu:53421|mmu:17970|mmu:16402|mmu:16409|mmu:11974|mmu:16412|mmu:21899|mmu:13058|mmu:11465|mmu:110557|mmu:100042561|mmu:16398|mmu:22146|mmu:14964|mmu:21825|mmu:16…	13039|101056305|17533|14130|21354|242341|50909|16784|13057|14131|12721|20288|56644|545486|14129|20778|246256|21826|13040|21828|16410|17972|108078|53421|17970|16402|16409|11974|16412|21899|13058|11465|110557|100042561|16398|22146|14964|21825|16414|12475|24088|12491|14972|17969|170786|21898|15018|67951|	http://www.genome.jp/kegg-bin/show_pathway?mmu04145/mmu:14131%09red/mmu:14130%09red/mmu:11974%09red/mmu:20288%09red/mmu:16402%09red/mmu:16398%09red/mmu:14972%09red/mmu:50909%09red/mmu:21828%09red/mmu:21826%09red/mmu:21825%09red/mmu:242341%09red/mmu:12491%09red/mmu:53421%09red/mmu:15018%09red/mmu:21354%09red/mmu:12475%09red/mmu:17970%09red/mmu:13039%09red/mmu:17972%09red/mmu:13040%09red/mmu:110557…
Ribosome	KEGG PATHWAY	mmu03010	41	145	0.0373797	0.178221	ENSMUSG00000000740|ENSMUSG00000030879|ENSMUSG00000037805|ENSMUSG00000003970|ENSMUSG00000032518|ENSMUSG00000090862|ENSMUSG00000062647|ENSMUSG00000043716|ENSMUSG00000047215|ENSMUSG00000037563|ENSMUSG00000032399|ENSMUSG00000050621|ENSMUSG00000106918|ENSMUSG00000057841|ENSMUSG00000047675|ENSMUSG00000047676|ENSMUSG00000025508|ENSMUSG00000012405|ENSMUSG00000100215|ENSMUSG00000008668|ENSMUSG00000059070|…	mmu:270106|mmu:27397|mmu:19896|mmu:26961|mmu:16785|mmu:68052|mmu:27176|mmu:19989|mmu:20005|mmu:100862433|mmu:67891|mmu:57294|mmu:66845|mmu:19951|mmu:20116|mmu:16785|mmu:67186|mmu:66480|mmu:20088|mmu:20084|mmu:19899|mmu:27370|mmu:19933|mmu:19921|mmu:67941|mmu:66448|mmu:20116|mmu:56040|mmu:20102|mmu:16898|mmu:225215|mmu:66489|mmu:66489|mmu:20103|mmu:269261|mmu:121022|mmu:11837|mmu:20104|mmu:76846|m…	270106|27397|19896|26961|16785|68052|27176|19989|20005|100862433|67891|57294|66845|19951|20116|16785|67186|66480|20088|20084|19899|27370|19933|19921|67941|66448|20116|56040|20102|16898|225215|66489|66489|20103|269261|121022|11837|20104|76846|16898|54127|	http://www.genome.jp/kegg-bin/show_pathway?mmu03010/mmu:270106%09red/mmu:76846%09red/mmu:66845%09red/mmu:56040%09red/mmu:19921%09red/mmu:121022%09red/mmu:27176%09red/mmu:20116%09red/mmu:67941%09red/mmu:20084%09red/mmu:20088%09red/mmu:66489%09red/mmu:16898%09red/mmu:26961%09red/mmu:269261%09red/mmu:11837%09red/mmu:16785%09red/mmu:57294%09red/mmu:19899%09red/mmu:27397%09red/mmu:66480%09red/mmu:1993…
p53 signaling pathway	KEGG PATHWAY	mmu04115	22	68	0.0402193	0.188396	ENSMUSG00000036390|ENSMUSG00000021453|ENSMUSG00000034165|ENSMUSG00000059552|ENSMUSG00000026029|ENSMUSG00000070348|ENSMUSG00000067006|ENSMUSG00000015312|ENSMUSG00000020326|ENSMUSG00000040274|ENSMUSG00000020427|ENSMUSG00000020184|ENSMUSG00000000184|ENSMUSG00000028893|ENSMUSG00000040152|ENSMUSG00000025647|ENSMUSG00000037411|ENSMUSG00000023067|ENSMUSG00000026389|ENSMUSG00000024778|ENSMUSG00000024521|…	mmu:13197|mmu:23882|mmu:12445|mmu:22059|mmu:12370|mmu:12443|mmu:20724|mmu:17873|mmu:12450|mmu:12571|mmu:16009|mmu:17246|mmu:12444|mmu:230784|mmu:21825|mmu:66940|mmu:18787|mmu:12575|mmu:68428|mmu:14102|mmu:58801|mmu:64058|	13197|23882|12445|22059|12370|12443|20724|17873|12450|12571|16009|17246|12444|230784|21825|66940|18787|12575|68428|14102|58801|64058|	http://www.genome.jp/kegg-bin/show_pathway?mmu04115/mmu:12571%09red/mmu:12575%09red/mmu:12370%09red/mmu:66940%09red/mmu:21825%09red/mmu:13197%09red/mmu:12450%09red/mmu:230784%09red/mmu:20724%09red/mmu:18787%09red/mmu:23882%09red/mmu:17873%09red/mmu:14102%09red/mmu:64058%09red/mmu:16009%09red/mmu:58801%09red/mmu:17246%09red/mmu:68428%09red/mmu:12445%09red/mmu:12444%09red/mmu:12443%09red/mmu:22059%…
African trypanosomiasis	KEGG PATHWAY	mmu05143	13	34	0.0420474	0.193563	ENSMUSG00000037405|ENSMUSG00000073940|ENSMUSG00000032508|ENSMUSG00000069919|ENSMUSG00000052305|ENSMUSG00000026582|ENSMUSG00000004929|ENSMUSG00000019846|ENSMUSG00000025746|ENSMUSG00000027398|ENSMUSG00000069917|ENSMUSG00000024401|ENSMUSG00000024778	mmu:15894|mmu:100503605|mmu:17874|mmu:15122|mmu:100503605|mmu:20339|mmu:50492|mmu:16775|mmu:16193|mmu:16176|mmu:15122|mmu:21926|mmu:14102|	15894|100503605|17874|15122|100503605|20339|50492|16775|16193|16176|15122|21926|14102|	http://www.genome.jp/kegg-bin/show_pathway?mmu05143/mmu:20339%09red/mmu:16775%09red/mmu:100503605%09red/mmu:50492%09red/mmu:15122%09red/mmu:16176%09red/mmu:15894%09red/mmu:16193%09red/mmu:21926%09red/mmu:17874%09red/mmu:14102%09red
Platelet activation	KEGG PATHWAY	mmu04611	37	131	0.0465317	0.210575	ENSMUSG00000022836|ENSMUSG00000024290|ENSMUSG00000031264|ENSMUSG00000001930|ENSMUSG00000021457|ENSMUSG00000028001|ENSMUSG00000002699|ENSMUSG00000058715|ENSMUSG00000027287|ENSMUSG00000052681|ENSMUSG00000030403|ENSMUSG00000022220|ENSMUSG00000028465|ENSMUSG00000000001|ENSMUSG00000004056|ENSMUSG00000028978|ENSMUSG00000020611|ENSMUSG00000043017|ENSMUSG00000024048|ENSMUSG00000033860|ENSMUSG00000025809|…	mmu:107589|mmu:19877|mmu:12229|mmu:22371|mmu:20963|mmu:14161|mmu:16822|mmu:14127|mmu:20619|mmu:215449|mmu:22323|mmu:104110|mmu:21894|mmu:14679|mmu:11652|mmu:18127|mmu:14674|mmu:19222|mmu:67268|mmu:99571|mmu:16412|mmu:18709|mmu:11465|mmu:53867|mmu:16398|mmu:17096|mmu:108101|mmu:110135|mmu:320207|mmu:12824|mmu:54519|mmu:19108|mmu:16399|mmu:21390|mmu:26416|mmu:234779|mmu:19878|	107589|19877|12229|22371|20963|14161|16822|14127|20619|215449|22323|104110|21894|14679|11652|18127|14674|19222|67268|99571|16412|18709|11465|53867|16398|17096|108101|110135|320207|12824|54519|19108|16399|21390|26416|234779|19878|	http://www.genome.jp/kegg-bin/show_pathway?mmu04611/mmu:19108%09red/mmu:215449%09red/mmu:99571%09red/mmu:22371%09red/mmu:16399%09red/mmu:16398%09red/mmu:18709%09red/mmu:108101%09red/mmu:26416%09red/mmu:21390%09red/mmu:14674%09red/mmu:104110%09red/mmu:320207%09red/mmu:19222%09red/mmu:21894%09red/mmu:12824%09red/mmu:19877%09red/mmu:107589%09red/mmu:18127%09red/mmu:14127%09red/mmu:16412%09red/mmu:14…
Natural killer cell mediated cytotoxicity	KEGG PATHWAY	mmu04650	34	119	0.0487889	0.217111	ENSMUSG00000020009|ENSMUSG00000031834|ENSMUSG00000059089|ENSMUSG00000021457|ENSMUSG00000037202|ENSMUSG00000002699|ENSMUSG00000058715|ENSMUSG00000033016|ENSMUSG00000037405|ENSMUSG00000001029|ENSMUSG00000004266|ENSMUSG00000054520|ENSMUSG00000022074|ENSMUSG00000024401|ENSMUSG00000042626|ENSMUSG00000034116|ENSMUSG00000030265|ENSMUSG00000018916|ENSMUSG00000030579|ENSMUSG00000027852|ENSMUSG00000043733|…	mmu:15979|mmu:18709|mmu:246256|mmu:20963|mmu:18646|mmu:16822|mmu:14127|mmu:18018|mmu:15894|mmu:15896|mmu:15170|mmu:24055|mmu:21933|mmu:21926|mmu:20416|mmu:22324|mmu:16653|mmu:12981|mmu:22177|mmu:18176|mmu:19247|mmu:19057|mmu:18106|mmu:14964|mmu:16408|mmu:16414|mmu:320207|mmu:19229|mmu:14972|mmu:19354|mmu:14102|mmu:15975|mmu:234779|mmu:271849|	15979|18709|246256|20963|18646|16822|14127|18018|15894|15896|15170|24055|21933|21926|20416|22324|16653|12981|22177|18176|19247|19057|18106|14964|16408|16414|320207|19229|14972|19354|14102|15975|234779|271849|	http://www.genome.jp/kegg-bin/show_pathway?mmu04650/mmu:16653%09red/mmu:18176%09red/mmu:14964%09red/mmu:16408%09red/mmu:14972%09red/mmu:271849%09red/mmu:18709%09red/mmu:21926%09red/mmu:246256%09red/mmu:15979%09red/mmu:19247%09red/mmu:320207%09red/mmu:15170%09red/mmu:19057%09red/mmu:18018%09red/mmu:19229%09red/mmu:24055%09red/mmu:14102%09red/mmu:22324%09red/mmu:16414%09red/mmu:234779%09red/mmu:129…

## Sheet: down
##Databases: KEGG PATHWAY
##Statistical test method: hypergeometric test / Fisher's exact test
##FDR correction method: Benjamini and Hochberg
#Term	Database	ID	Input number	Background number	P-Value	Corrected P-Value	Input	KEGG_ID/KO	Entrez_ID	Hyperlink
Glutamatergic synapse	KEGG PATHWAY	mmu04724	21	114	3.05215e-05	0.00766091	ENSMUSG00000085830|ENSMUSG00000032766|ENSMUSG00000022376|ENSMUSG00000039579|ENSMUSG00000025892|ENSMUSG00000044005|ENSMUSG00000035745|ENSMUSG00000032017|ENSMUSG00000024211|ENSMUSG00000063594|ENSMUSG00000050211|ENSMUSG00000003974|ENSMUSG00000064202|ENSMUSG00000056073|ENSMUSG00000038738|ENSMUSG00000002771|ENSMUSG00000026959|ENSMUSG00000022935|ENSMUSG00000056755|ENSMUSG00000010064|ENSMUSG00000057614	mmu:14810|mmu:66066|mmu:11514|mmu:242443|mmu:14802|mmu:216456|mmu:170483|mmu:110637|mmu:14823|mmu:14709|mmu:329502|mmu:108069|mmu:20510|mmu:14806|mmu:243961|mmu:14814|mmu:14810|mmu:14805|mmu:108073|mmu:76257|mmu:14677|	14810|66066|11514|242443|14802|216456|170483|110637|14823|14709|329502|108069|20510|14806|243961|14814|14810|14805|108073|76257|14677|	http://www.genome.jp/kegg-bin/show_pathway?mmu04724/mmu:14823%09red/mmu:243961%09red/mmu:329502%09red/mmu:14709%09red/mmu:14677%09red/mmu:216456%09red/mmu:14805%09red/mmu:14814%09red/mmu:14806%09red/mmu:20510%09red/mmu:14810%09red/mmu:14802%09red/mmu:66066%09red/mmu:170483%09red/mmu:76257%09red/mmu:11514%09red/mmu:242443%09red/mmu:110637%09red/mmu:108069%09red/mmu:108073%09red
Basal cell carcinoma	KEGG PATHWAY	mmu05217	13	55	0.000117562	0.0147541	ENSMUSG00000048402|ENSMUSG00000030093|ENSMUSG00000029071|ENSMUSG00000001761|ENSMUSG00000064325|ENSMUSG00000033227|ENSMUSG00000020888|ENSMUSG00000020135|ENSMUSG00000021466|ENSMUSG00000081683|ENSMUSG00000036961|ENSMUSG00000025407|ENSMUSG00000021318	mmu:14633|mmu:22421|mmu:13542|mmu:319757|mmu:15245|mmu:22420|mmu:13543|mmu:23805|mmu:19206|mmu:93897|mmu:22423|mmu:14632|mmu:14634|	14633|22421|13542|319757|15245|22420|13543|23805|19206|93897|22423|14632|14634|	http://www.genome.jp/kegg-bin/show_pathway?mmu05217/mmu:15245%09red/mmu:93897%09red/mmu:319757%09red/mmu:13543%09red/mmu:13542%09red/mmu:22423%09red/mmu:22420%09red/mmu:22421%09red/mmu:23805%09red/mmu:19206%09red/mmu:14634%09red/mmu:14632%09red/mmu:14633%09red
Axon guidance	KEGG PATHWAY	mmu04360	20	129	0.000364802	0.0243012	ENSMUSG00000060534|ENSMUSG00000026235|ENSMUSG00000031385|ENSMUSG00000003934|ENSMUSG00000029869|ENSMUSG00000026842|ENSMUSG00000031398|ENSMUSG00000059857|ENSMUSG00000025207|ENSMUSG00000028876|ENSMUSG00000032537|ENSMUSG00000027200|ENSMUSG00000029168|ENSMUSG00000029095|ENSMUSG00000022883|ENSMUSG00000039913|ENSMUSG00000052133|ENSMUSG00000028661|ENSMUSG00000020099|ENSMUSG00000057614	mmu:13176|mmu:13838|mmu:140571|mmu:13643|mmu:13848|mmu:11350|mmu:18846|mmu:80883|mmu:26456|mmu:13837|mmu:270190|mmu:214968|mmu:65254|mmu:231148|mmu:19876|mmu:241656|mmu:20357|mmu:13842|mmu:107449|mmu:14677|	13176|13838|140571|13643|13848|11350|18846|80883|26456|13837|270190|214968|65254|231148|19876|241656|20357|13842|107449|14677|	http://www.genome.jp/kegg-bin/show_pathway?mmu04360/mmu:214968%09red/mmu:231148%09red/mmu:80883%09red/mmu:14677%09red/mmu:270190%09red/mmu:13838%09red/mmu:20357%09red/mmu:140571%09red/mmu:11350%09red/mmu:13837%09red/mmu:13643%09red/mmu:13176%09red/mmu:18846%09red/mmu:65254%09red/mmu:19876%09red/mmu:107449%09red/mmu:241656%09red/mmu:13848%09red/mmu:13842%09red/mmu:26456%09red
Other glycan degradation	KEGG PATHWAY	mmu00511	7	18	0.000398364	0.0243012	ENSMUSG00000034000|ENSMUSG00000029119|ENSMUSG00000005142|ENSMUSG00000039307|ENSMUSG00000045594|ENSMUSG00000028467|ENSMUSG00000032295	mmu:241159|mmu:17160|mmu:17159|mmu:238023|mmu:12091|mmu:230101|mmu:73744|	241159|17160|17159|238023|12091|230101|73744|	http://www.genome.jp/kegg-bin/show_pathway?mmu00511/mmu:73744%09red/mmu:241159%09red/mmu:17160%09red/mmu:17159%09red/mmu:230101%09red/mmu:238023%09red/mmu:12091%09red
Nicotine addiction	KEGG PATHWAY	mmu05033	10	40	0.000484087	0.0243012	ENSMUSG00000085830|ENSMUSG00000000560|ENSMUSG00000025892|ENSMUSG00000035745|ENSMUSG00000002771|ENSMUSG00000026959|ENSMUSG00000039579|ENSMUSG00000029212|ENSMUSG00000007653|ENSMUSG00000029211	mmu:14810|mmu:14395|mmu:14802|mmu:170483|mmu:14814|mmu:14810|mmu:242443|mmu:14400|mmu:14401|mmu:14397|	14810|14395|14802|170483|14814|14810|242443|14400|14401|14397|	http://www.genome.jp/kegg-bin/show_pathway?mmu05033/mmu:14401%09red/mmu:14400%09red/mmu:14397%09red/mmu:14395%09red/mmu:14814%09red/mmu:14810%09red/mmu:14802%09red/mmu:170483%09red/mmu:242443%09red
