# Supplementary material for: A transcriptomic study of probenecid on injured spinal cords in mice
Source: PeerJ. 2020 Jan 3;8:e8367. doi: 10.7717/peerj.8367 (PMC6944129; doi:10.7717/peerj.8367)
Supplement: Supplemental Information 5 [file peerj-08-8367-s005.xlsx]

## Sheet: UP
##Databases: KEGG PATHWAY
##Statistical test method: hypergeometric test / Fisher's exact test
##FDR correction method: Benjamini and Hochberg
#Term	Database	ID	Input number	Background number	P-Value	Corrected P-Value	Input	KEGG_ID/KO	Entrez_ID	Hyperlink
ECM-receptor interaction	KEGG PATHWAY	mmu04512	6	88	8.62282e-05	0.0100025	ENSMUSG00000028047|ENSMUSG00000027966|ENSMUSG00000028197|ENSMUSG00000024330|ENSMUSG00000043719|ENSMUSG00000041936	mmu:21827|mmu:12814|mmu:71355|mmu:12815|mmu:245026|mmu:11603|	21827|12814|71355|12815|245026|11603|	http://www.genome.jp/kegg-bin/show_pathway?mmu04512/mmu:11603%09red/mmu:245026%09red/mmu:12814%09red/mmu:71355%09red/mmu:12815%09red/mmu:21827%09red

## Sheet: down
##Databases: KEGG PATHWAY
##Statistical test method: hypergeometric test / Fisher's exact test
##FDR correction method: Benjamini and Hochberg
#Term	Database	ID	Input number	Background number	P-Value	Corrected P-Value	Input	KEGG_ID/KO	Entrez_ID	Hyperlink
Cell adhesion molecules (CAMs)	KEGG PATHWAY	mmu04514	21	160	2.96627e-08	5.16131e-06	ENSMUSG00000041378|ENSMUSG00000000303|ENSMUSG00000073421|ENSMUSG00000030830|ENSMUSG00000026582|ENSMUSG00000000290|ENSMUSG00000020717|ENSMUSG00000001946|ENSMUSG00000026581|ENSMUSG00000026580|ENSMUSG00000066058|ENSMUSG00000067235|ENSMUSG00000031871|ENSMUSG00000016494|ENSMUSG00000056569|ENSMUSG00000001029|ENSMUSG00000001281|ENSMUSG00000026395|ENSMUSG00000021638|ENSMUSG00000027111|ENSMUSG00000038235	mmu:12741|mmu:12550|mmu:14961|mmu:16408|mmu:20339|mmu:16414|mmu:18613|mmu:69524|mmu:20343|mmu:20344|mmu:242653|mmu:101056305|mmu:12562|mmu:12490|mmu:17528|mmu:15896|mmu:16421|mmu:19264|mmu:18260|mmu:16403|mmu:16456|	12741|12550|14961|16408|20339|16414|18613|69524|20343|20344|242653|101056305|12562|12490|17528|15896|16421|19264|18260|16403|16456|	http://www.genome.jp/kegg-bin/show_pathway?mmu04514/mmu:20339%09red/mmu:242653%09red/mmu:12490%09red/mmu:101056305%09red/mmu:12562%09red/mmu:16408%09red/mmu:16421%09red/mmu:20344%09red/mmu:19264%09red/mmu:18613%09red/mmu:16403%09red/mmu:12550%09red/mmu:20343%09red/mmu:18260%09red/mmu:14961%09red/mmu:17528%09red/mmu:16414%09red/mmu:16456%09red/mmu:15896%09red/mmu:12741%09red/mmu:69524%09red
Malaria	KEGG PATHWAY	mmu05144	10	48	3.61352e-06	0.000302582	ENSMUSG00000030830|ENSMUSG00000040152|ENSMUSG00000000290|ENSMUSG00000020717|ENSMUSG00000026582|ENSMUSG00000026580|ENSMUSG00000002944|ENSMUSG00000027398|ENSMUSG00000037872|ENSMUSG00000039005	mmu:16408|mmu:21825|mmu:16414|mmu:18613|mmu:20339|mmu:20344|mmu:12491|mmu:16176|mmu:13349|mmu:21898|	16408|21825|16414|18613|20339|20344|12491|16176|13349|21898|	http://www.genome.jp/kegg-bin/show_pathway?mmu05144/mmu:20339%09red/mmu:16414%09red/mmu:12491%09red/mmu:16408%09red/mmu:20344%09red/mmu:21898%09red/mmu:13349%09red/mmu:16176%09red/mmu:21825%09red/mmu:18613%09red
Leukocyte transendothelial migration	KEGG PATHWAY	mmu04670	15	121	5.21692e-06	0.000302582	ENSMUSG00000001946|ENSMUSG00000041378|ENSMUSG00000030830|ENSMUSG00000000290|ENSMUSG00000061353|ENSMUSG00000020717|ENSMUSG00000067818|ENSMUSG00000015340|ENSMUSG00000004864|ENSMUSG00000066058|ENSMUSG00000031207|ENSMUSG00000006519|ENSMUSG00000021638|ENSMUSG00000031871|ENSMUSG00000038235	mmu:69524|mmu:12741|mmu:16408|mmu:16414|mmu:20315|mmu:18613|mmu:98932|mmu:13058|mmu:26415|mmu:242653|mmu:17698|mmu:13057|mmu:18260|mmu:12562|mmu:16456|	69524|12741|16408|16414|20315|18613|98932|13058|26415|242653|17698|13057|18260|12562|16456|	http://www.genome.jp/kegg-bin/show_pathway?mmu04670/mmu:26415%09red/mmu:242653%09red/mmu:16414%09red/mmu:12562%09red/mmu:17698%09red/mmu:16408%09red/mmu:18613%09red/mmu:18260%09red/mmu:98932%09red/mmu:13057%09red/mmu:20315%09red/mmu:16456%09red/mmu:13058%09red/mmu:12741%09red/mmu:69524%09red
ECM-receptor interaction	KEGG PATHWAY	mmu04512	12	88	1.92498e-05	0.000837365	ENSMUSG00000031502|ENSMUSG00000040152|ENSMUSG00000031503|ENSMUSG00000001930|ENSMUSG00000042284|ENSMUSG00000002900|ENSMUSG00000002944|ENSMUSG00000026193|ENSMUSG00000028763|ENSMUSG00000001281|ENSMUSG00000027111|ENSMUSG00000026043	mmu:12826|mmu:21825|mmu:12827|mmu:22371|mmu:109700|mmu:16777|mmu:12491|mmu:14268|mmu:15530|mmu:16421|mmu:16403|mmu:12825|	12826|21825|12827|22371|109700|16777|12491|14268|15530|16421|16403|12825|	http://www.genome.jp/kegg-bin/show_pathway?mmu04512/mmu:14268%09red/mmu:109700%09red/mmu:16421%09red/mmu:22371%09red/mmu:16403%09red/mmu:12825%09red/mmu:12827%09red/mmu:12826%09red/mmu:21825%09red/mmu:16777%09red/mmu:15530%09red/mmu:12491%09red
PI3K-Akt signaling pathway	KEGG PATHWAY	mmu04151	25	351	4.88409e-05	0.00169966	ENSMUSG00000021457|ENSMUSG00000001930|ENSMUSG00000006386|ENSMUSG00000058755|ENSMUSG00000026193|ENSMUSG00000031465|ENSMUSG00000001281|ENSMUSG00000024620|ENSMUSG00000029648|ENSMUSG00000042284|ENSMUSG00000062960|ENSMUSG00000019966|ENSMUSG00000028978|ENSMUSG00000027111|ENSMUSG00000026043|ENSMUSG00000000489|ENSMUSG00000030748|ENSMUSG00000020357|ENSMUSG00000002900|ENSMUSG00000040152|ENSMUSG00000026785|…	mmu:20963|mmu:22371|mmu:21687|mmu:18413|mmu:14268|mmu:11601|mmu:16421|mmu:18596|mmu:14254|mmu:109700|mmu:16542|mmu:17311|mmu:18127|mmu:16403|mmu:12825|mmu:18591|mmu:16190|mmu:14257|mmu:16777|mmu:21825|mmu:263803|mmu:12827|mmu:12826|mmu:12986|mmu:21898|	20963|22371|21687|18413|14268|11601|16421|18596|14254|109700|16542|17311|18127|16403|12825|18591|16190|14257|16777|21825|263803|12827|12826|12986|21898|	http://www.genome.jp/kegg-bin/show_pathway?mmu04151/mmu:17311%09red/mmu:11601%09red/mmu:16777%09red/mmu:16542%09red/mmu:22371%09red/mmu:16403%09red/mmu:16190%09red/mmu:21825%09red/mmu:14268%09red/mmu:109700%09red/mmu:16421%09red/mmu:12825%09red/mmu:12827%09red/mmu:12826%09red/mmu:18413%09red/mmu:12986%09red/mmu:21898%09red/mmu:263803%09red/mmu:18591%09red/mmu:18596%09red/mmu:20963%09red/mmu:14254…
Hematopoietic cell lineage	KEGG PATHWAY	mmu04640	11	86	7.19515e-05	0.00208659	ENSMUSG00000039062|ENSMUSG00000042284|ENSMUSG00000030748|ENSMUSG00000002944|ENSMUSG00000016494|ENSMUSG00000027398|ENSMUSG00000028859|ENSMUSG00000024673|ENSMUSG00000026072|ENSMUSG00000027111|ENSMUSG00000019966	mmu:16790|mmu:109700|mmu:16190|mmu:12491|mmu:12490|mmu:16176|mmu:12986|mmu:12482|mmu:16177|mmu:16403|mmu:17311|	16790|109700|16190|12491|12490|16176|12986|12482|16177|16403|17311|	http://www.genome.jp/kegg-bin/show_pathway?mmu04640/mmu:12986%09red/mmu:12482%09red/mmu:12490%09red/mmu:12491%09red/mmu:109700%09red/mmu:17311%09red/mmu:16790%09red/mmu:16403%09red/mmu:16177%09red/mmu:16176%09red/mmu:16190%09red
Focal adhesion	KEGG PATHWAY	mmu04510	16	207	0.000471463	0.0117192	ENSMUSG00000031503|ENSMUSG00000031502|ENSMUSG00000040152|ENSMUSG00000029648|ENSMUSG00000024620|ENSMUSG00000001930|ENSMUSG00000067818|ENSMUSG00000020357|ENSMUSG00000042284|ENSMUSG00000026193|ENSMUSG00000001281|ENSMUSG00000000489|ENSMUSG00000002900|ENSMUSG00000062960|ENSMUSG00000027111|ENSMUSG00000026043	mmu:12827|mmu:12826|mmu:21825|mmu:14254|mmu:18596|mmu:22371|mmu:98932|mmu:14257|mmu:109700|mmu:14268|mmu:16421|mmu:18591|mmu:16777|mmu:16542|mmu:16403|mmu:12825|	12827|12826|21825|14254|18596|22371|98932|14257|109700|14268|16421|18591|16777|16542|16403|12825|	http://www.genome.jp/kegg-bin/show_pathway?mmu04510/mmu:14254%09red/mmu:14257%09red/mmu:14268%09red/mmu:109700%09red/mmu:16542%09red/mmu:22371%09red/mmu:16403%09red/mmu:16421%09red/mmu:18591%09red/mmu:98932%09red/mmu:12825%09red/mmu:18596%09red/mmu:12827%09red/mmu:12826%09red/mmu:21825%09red/mmu:16777%09red
Rap1 signaling pathway	KEGG PATHWAY	mmu04015	16	214	0.000659676	0.0143479	ENSMUSG00000000303|ENSMUSG00000030830|ENSMUSG00000040152|ENSMUSG00000000290|ENSMUSG00000029648|ENSMUSG00000024620|ENSMUSG00000006386|ENSMUSG00000000489|ENSMUSG00000004864|ENSMUSG00000024451|ENSMUSG00000019966|ENSMUSG00000042745|ENSMUSG00000022220|ENSMUSG00000031465|ENSMUSG00000020357|ENSMUSG00000062960	mmu:12550|mmu:16408|mmu:21825|mmu:16414|mmu:14254|mmu:18596|mmu:21687|mmu:18591|mmu:26415|mmu:106952|mmu:17311|mmu:15901|mmu:104110|mmu:11601|mmu:14257|mmu:16542|	12550|16408|21825|16414|14254|18596|21687|18591|26415|106952|17311|15901|104110|11601|14257|16542|	http://www.genome.jp/kegg-bin/show_pathway?mmu04015/mmu:14254%09red/mmu:17311%09red/mmu:26415%09red/mmu:14257%09red/mmu:106952%09red/mmu:11601%09red/mmu:16408%09red/mmu:16542%09red/mmu:12550%09red/mmu:104110%09red/mmu:18591%09red/mmu:18596%09red/mmu:21687%09red/mmu:16414%09red/mmu:21825%09red/mmu:15901%09red
Amoebiasis	KEGG PATHWAY	mmu05146	11	119	0.000932731	0.0180328	ENSMUSG00000000290|ENSMUSG00000031503|ENSMUSG00000045827|ENSMUSG00000031502|ENSMUSG00000026072|ENSMUSG00000026043|ENSMUSG00000026193|ENSMUSG00000027398|ENSMUSG00000019987|ENSMUSG00000002900|ENSMUSG00000039005	mmu:16414|mmu:12827|mmu:20723|mmu:12826|mmu:16177|mmu:12825|mmu:14268|mmu:16176|mmu:11846|mmu:16777|mmu:21898|	16414|12827|20723|12826|16177|12825|14268|16176|11846|16777|21898|	http://www.genome.jp/kegg-bin/show_pathway?mmu05146/mmu:11846%09red/mmu:16414%09red/mmu:14268%09red/mmu:16777%09red/mmu:20723%09red/mmu:21898%09red/mmu:12825%09red/mmu:16176%09red/mmu:12827%09red/mmu:12826%09red/mmu:16177%09red
